1 *Article*

2 **Evidence of a causal relationship between genetic tendency to**  
3 **gain muscle mass and uterine leiomyomata**

4 Eeva Sliz<sup>1,2</sup>, Jaakko Tyrmi<sup>1,2</sup>, Nilufer Rahmioglu<sup>6,7</sup>, Krina T. Zondervan<sup>6,7</sup>, Christian M.  
5 Becker<sup>6</sup>, FinnGen, Outi Uimari<sup>3,4,5\*</sup>, Johannes Kettunen<sup>1,2\*</sup>

6 <sup>1</sup> Center for Life Course Health Research, Faculty of Medicine, University of Oulu, Finland

7 <sup>2</sup> Biocenter Oulu, Oulu, Finland

8 <sup>3</sup> Department of Obstetrics and Gynecology, Oulu University Hospital, Oulu, Finland

9 <sup>4</sup> PEDEGO Research Unit, University of Oulu and Oulu University Hospital, Oulu, Finland

10 <sup>5</sup> Medical Research Center Oulu, University of Oulu and Oulu University Hospital, Oulu,  
11 Finland

12 <sup>6</sup> Oxford Endometriosis CaRe Centre, Nuffield Department of Women's and Reproductive  
13 Health, University of Oxford, UK

14 <sup>7</sup> Wellcome Centre for Human Genetics, University of Oxford, UK

15 \*Equal contribution of the last authors

16 Address for correspondence:

17 Eeva Sliz

18 Center For Life Course Health Research

19 Faculty of Medicine

20 Aapistie 5A

21 P.O.Box 5000, 90014 University of Oulu

22 Oulu, Finland

23 phone: +358 50 305 4865

24 e-mail: [eeva.sliz@oulu.fi](mailto:eeva.sliz@oulu.fi)

25 Word count – Introductory paragraph: 150

26 Word count – Manuscript main body: 1627

27 Figures: 4

28 Tables: 1

29 Supplementary figures: 63

30 Supplementary tables: 9

31 References: 68

32 Key words: Uterine leiomyoma, GWAS, smooth muscle, muscle mass

33 *Summary statistics will be made available through the NHGRI-EBI GWAS Catalog with*  
34 *GCSTxxxxxxx upon publication.*

35 **Uterine leiomyomata (UL) are the most common benign tumours of the female genital**  
36 **tract with an estimated lifetime incidence of up to 70%<sup>1</sup>. To date, 7 genome-wide**  
37 **association studies (GWASs) have identified 35 loci predisposing to UL. To improve the**  
38 **understanding of the underlying genetic pathways, we conducted the largest genetic**  
39 **association study of UL to date in 426,558 European women from FinnGen and a**  
40 **previously published UL meta-GWAS<sup>2</sup>. We identified 36 novel and replicated 31**  
41 **previously reported loci. Annotations of the potential candidate genes suggest**  
42 **involvement of smooth muscle cell (SMC) differentiation and/or proliferation-**  
43 **regulating genes in modulating UL risk. Our results further advocate that genetic**  
44 **predisposition to increased fat-free mass may be causally related to UL risk,**  
45 **underscoring the involvement of altered muscle tissue biology in UL pathophysiology.**  
46 **Overall, our findings provide novel insights into genetic risk factors related to UL,**  
47 **which may aid in developing novel treatment strategies.**

48 UL are hormone-driven benign neoplasms of the uterus composed mostly of SMC and  
49 fibroblasts with a profound component of extracellular matrix (ECM). UL are present in  
50 single or multiple numbers, with size ranging from millimeters to 20 cm or more in  
51 diameter<sup>3</sup>. In 25-50% of women with ULs, the enlarged and deformed uterus can cause  
52 symptoms such as heavy or prolonged menstrual bleeding resulting in anemia, reduced  
53 fertility, and pregnancy complications<sup>4</sup>. Major risk factors for UL are family history, African  
54 ancestry, increasing age up to menopause, and nulliparity<sup>5</sup>. Also, metabolic factors, including  
55 hypertension and increased body mass index (BMI), have been reported in association with  
56 UL susceptibility<sup>6</sup>. Familial aggregation, twin studies, and disparity in prevalence between  
57 different ethnic groups suggest that genetic factors modulate UL risk<sup>7-10</sup>.

58 Until recently, the focus in the genetics of UL has been on somatic rearrangements, and key  
59 driver variations in *MED12*, *FH*, *HMG2* and *COL4A6-COL4A5* have been reported<sup>11</sup>. To  
60 add understanding to the heritable genetic underpinnings, we conducted two sets of fixed-  
61 effect, inverse-variance weighted meta-analyses with data from FinnGen (18,060 cases and  
62 105,519 female controls) and 1) a previously published UL meta-GWAS<sup>2</sup> totaling 53,534  
63 cases and 373,024 female controls in 'META-1' and 2) the UK Biobank totaling 33,244  
64 cases and 311,271 controls in 'META-2'. META-1 was restricted to publicly available  
65 10,000 variants from the previous meta-GWAS<sup>2</sup>, whereas the META-2 included 10,693,588  
66 variants across the genome. In META-1, we identified 63 loci associating with UL at  
67  $p < 5 \times 10^{-8}$  (Figure 1, Table S1); of these, 32 were novel (Table 1). In META-2, we identified  
68 51 loci out of which 4 had not been associated with UL risk in prior GWASs or in META-1  
69 (Figure 1, Table 1, Table S2). Regional association plots of the novel loci are presented in  
70 Figures S1-S36. There was no evidence of inflation in the test statistics (Figure S37). LD  
71 score (LDSC) regression-derived SNP-based heritability was estimated to be 0.099 (standard  
72 error=0.01) on the liability scale. Characterization of the genome-wide results of META-2  
73 suggested that the key UL associated variants were mostly intronic (Figure 2A). Genes  
74 associated with UL risk (Figure 2B) were significantly enriched on pathways related to gonad  
75 development, positive regulation of growth, and cellular senescence (Figure 2C) and they  
76 were mostly expressed in uterus, cervix, and fallopian tube (Figure 2D). In two of the novel  
77 loci, we found evidence that altered gene expression mediates UL association (Figures S38-  
78 S40).

79 Previous GWAS findings<sup>2,12-17</sup> have indicated that genetic factors altering pathways involved  
80 in estrogen signalling, Wnt signalling, transforming growth factor (TGF)- $\beta$  signalling, and  
81 cell cycle progression are associated with UL risk<sup>18</sup>. The novel loci identified in this study  
82 further underscore the involvement of pathways regulating SMC proliferation in modulation  
83 of UL risk. Many of these pathways are interrelated: for example, both estrogen and

84 progesterone increase the secretion of Wnt ligands from myometrial or leiomyoma SMC,  
85 which promotes cell proliferation and tumorigenesis via activation of  $\beta$ -catenin<sup>19</sup>. Steroid  
86 hormones also influence the production of ECM via signalling through the TGF- $\beta$  family of  
87 ligands and receptors that are highly expressed in multiple fibrotic conditions<sup>20-26</sup> and  
88 contribute to the fibrotic phenotype seen in UL<sup>24,25,27-29</sup>. We identified multiple loci with  
89 potential candidate genes functioning in one or more of these pathways, and, in the following,  
90 we describe some of our key findings with the focus on loci involved in regulation of SMC  
91 proliferation.

92 A central finding is the novel association at 17p12 harbouring myocardin (*MYOCD*; [Figure](#)  
93 [S27](#)). Myocardin is a transcription factor expressed in smooth muscle tissues, including most  
94 prominently arteries and colon, but also uterus ([Figure S41](#)), and it is required for SMC  
95 differentiation<sup>30</sup>. The expression of myocardin has been shown to be downregulated in UL  
96 tissue compared with normal myometrium<sup>31</sup>. Also, it has been proposed that the loss of  
97 myocardin function may be a key factor in driving SMC proliferation in UL<sup>31</sup>; however, there  
98 are no reported GWAS associations implicating myocardin until now. The lead variants near  
99 *MYOCD* are intergenic variants with no strong evidence of altered regulatory consequences  
100 ([Table S3](#)) and, thus, a possible association-driving mechanism remains inconclusive. We  
101 identified another myocardin-related novel UL risk association near ‘myocardin-induced  
102 smooth muscle cell lncRNA, inducer of differentiation’ (*MYOSLID*), a transcriptional target  
103 of myocardin<sup>32</sup> ([Figure S6](#)). RegulomeDB<sup>33</sup> annotation provided robust evidence that the  
104 association lead variant is a regulatory variant ([Table S4](#)) altering binding of multiple  
105 transcription factors ([Table S5](#)), including Fos proto-oncogene (FOS) that has been shown to  
106 be downregulated in UL<sup>34</sup>. To add yet another example of a myocardin-related UL risk loci, a  
107 well-established UL risk association at 22q13.1<sup>2,12,16,35,36</sup> locates near ‘myocardin related  
108 transcription factor A’ (*MRTFA*; also known as *MKLI*), a gene interacting with myocardin<sup>37</sup>.  
109 Also, expression of *MRTFA/MKLI* has been shown to be downregulated in UL-related  
110 deletions at 22q<sup>38</sup>.

111 Others have suggested that loss of myocardin function may account for the differentiation  
112 defects of human leiomyosarcoma cells during malignant transformation<sup>39</sup>: downregulation  
113 of myocardin resulted in lower expression of cyclin dependent kinase inhibitor 1A  
114 (*CDKN1A*; also known as p21), a mediator of cell cycle G1 phase arrest, which facilitated  
115 cell cycle progression. We identified a novel UL association at 6p21.2 near *CDKN1A* ([Figure](#)  
116 [S13](#)); the association lead variants locate on intergenic region with possible regulatory  
117 consequences ([Table S6](#)). Previous evidence suggests that *CDKN1A* is among the genes, the  
118 expression of which correlates with UL size<sup>40</sup>. Another novel UL association at 20q13.31  
119 harbours RNA binding motif protein 38 (*RBM38*; [Figure S29](#)) that specifically binds to and  
120 regulates the stability of *CDKN1A* transcripts<sup>37</sup>. In this locus, the UL risk-increasing  
121 rs13039273-C associates with lower *RBM38* expression in ovary ( $p=8.7 \times 10^{-6}$ ) ([Table S7](#),  
122 [Figure S42](#); eQTL in uterus  $p=2.2 \times 10^{-3}$ ). Relevant to UL, a variant in the same locus  
123 (rs760640162) has been previously associated with ‘pregnancy examination and test’  
124 ( $p=5.97 \times 10^{-15}$ ) in the UK Biobank<sup>41,42</sup>. Interestingly, estrogen receptor (ER) $\alpha$  has been shown  
125 to inhibit expression of myocardin<sup>31</sup>, suggesting that the ability of myocardin-CDKN1A-  
126 signalling to inhibit cell cycle progression may be impaired in tissues enriched with ER $\alpha$ .  
127 Taken together our findings and previous evidence, it seems highly probable that  
128 downregulation of myocardin-CDKN1A signalling increases the risk of UL.

129 We used an automated LDSC regression pipeline<sup>43</sup> to evaluate the genetic correlations ( $r_g$ ) of  
130 UL with other traits ([Figure 2](#); [Table S8](#)). The most robustly correlated traits were seen for  
131 other gynecological traits, such as bilateral oophorectomy ( $r_g=0.74$ ,  $p=1.05 \times 10^{-25}$ ),  
132 hysterectomy ( $r_g=0.62$ ,  $p=3.24 \times 10^{-19}$ ), age at menarche ( $r_g=-0.18$ ,  $p=1.40 \times 10^{-9}$ ), excessive

133 frequent and irregular menstruation ( $r_g=0.51$ ,  $p=5.66 \times 10^{-7}$ ), having had menopause ( $r_g=-0.33$ ,  
134  $p=2.31 \times 10^{-5}$ ), and usage of hormonal replacement therapy ( $r_g=0.20$ ,  $p=5.54 \times 10^{-5}$ ). Strong  
135 correlations were also seen between UL and anthropometric and metabolic measures,  
136 including whole body fat-free mass ( $r_g=0.11$ ,  $p=4.21 \times 10^{-5}$ ), high blood pressure ( $r_g=0.15$ ,  
137  $p=4.58 \times 10^{-6}$ ), and serum triglyceride level ( $r_g=0.16$ ,  $p=4.80 \times 10^{-5}$ ). Genetic susceptibility for  
138 UL was also correlated with genetic susceptibility for multiple psychiatric or mood-related  
139 traits, including depressive symptoms ( $r_g=0.20$ ,  $p=3.31 \times 10^{-5}$ ) or neuroticism score ( $r_g=0.14$ ,  
140  $p=3.88 \times 10^{-5}$ ).

141 To estimate the causal relationships between UL and the key traits showing significant  $r_g$   
142 with UL, we applied two-sample Mendelian randomization. Our results suggest that genetic  
143 tendency to accumulate fat-free mass may be causally linked to higher risk of UL  
144 ( $p=2.37 \times 10^{-3}$ ; [Figure 3](#); [Table S9](#)). In line with this, the higher impedance of whole body (i.e.,  
145 a bioelectrical measure used for estimating body composition; lower muscle mass leads to  
146 higher impedance) was causally associated with a lower risk of UL ( $p=1.05 \times 10^{-3}$ ). When  
147 considering the null causal effect of whole-body fat mass on UL risk ( $p=0.46$ ), it seems  
148 apparent that the nominally significant ( $p=8.40 \times 10^{-3}$ ) causal effect of BMI on UL in the  
149 present study and the previously reported associations of BMI with UL risk<sup>44-46</sup> arise from the  
150 increased lean body mass rather than fat mass. Although we did not observe horizontal  
151 pleiotropy, the causal estimates were heterogenic for many key traits ([Table S9](#)), suggesting  
152 that all the underlying genetic pathways may not function in a consistent manner – thus, these  
153 results need to be interpreted with caution. However, in the leave-one-out sensitivity analyses  
154 all causal estimates were consistently positive (higher fat-free mass was causally associated  
155 with higher risk of UL) or negative (higher impedance was causally associated with lower  
156 risk of UL) suggesting that there is no single variant driving the causal associations ([Figures](#)  
157 [S50-S63](#)). Regarding most of the gynecological traits, the causal direction with UL was not  
158 clear ([Table S9](#)), suggesting that the shared molecular factors predispose to multiple  
159 gynecological complications simultaneously instead of one being causal to another. Of note,  
160 we replicated the previously reported finding of genetic predisposition to UL being causal to  
161 excessive menstrual bleeding<sup>2</sup> ( $p=1.07 \times 10^{-4}$ ).

162 The discovered causal relationship between genetic tendency to accumulate fat-free mass and  
163 UL risk provides a novel perspective on UL-related pathophysiology. UL are considered  
164 estrogen-dependent, and UL have higher ER $\alpha$  expression compared with normal uterine  
165 myometria<sup>47,48</sup>. ERs are expressed in a variety of tissues, including all musculoskeletal  
166 tissues<sup>49</sup>. In females, muscle mass and strength are closely coupled with estrogen status: girls  
167 begin to gain muscle mass after the onset of puberty<sup>50</sup> whereas in older age during  
168 perimenopausal and postmenopausal periods, muscle strength declines considerably<sup>51,52</sup>. If  
169 estrogen enhances muscle growth<sup>53</sup>, the observed causal relationship between fat-free mass  
170 and UL risk could arise secondary to high estrogen contributing to the muscle growth. Many  
171 of the newly identified candidate genes, however, directly regulate cell proliferation – thus, it  
172 remains possible that the estrogen-rich environment, due to sexual maturity, may trigger  
173 excess SMC growth resulting in ULs in women who are genetically susceptible to build up  
174 muscle.

175 Currently, the only essentially curative treatment for UL is hysterectomy, which underscores  
176 the high demand for the development of alternative effective therapies. Our findings double  
177 the number of known UL risk loci and, thus, the herein presented results provide several  
178 potential targets for translational research to develop pharmacologic interventions for UL.  
179 Therapies targeted at myocardin-CDKN1A signalling or, considering the causal evidence,  
180 other factors regulating muscle growth may hold the greatest potential.

1 **Table 1. Novel UL risk loci.**

2 The table reports novel distinct loci (more than 1Mb apart) containing at least one variant identified to be associated with UL at  $p < 5 \times 10^{-8}$  in a meta-analysis of  
 3 53,534 UL cases and 373,024 female controls from FinnGen and a previously published meta-GWAS of UL<sup>2</sup> (META-1) and in a meta-analysis of 33,244 UL  
 4 cases and 311,271 female controls from FinnGen and the UK Biobank (META-2).

| Locus                       | Chr:Pos (hg38) | Nearest gene(s)         | Candidate gene(s)   | rsID        | EA | EAF  | OR (95% CI)      | P-value  | HetPVal | FIN enr. |
|-----------------------------|----------------|-------------------------|---------------------|-------------|----|------|------------------|----------|---------|----------|
| <i>Novel loci in META-1</i> |                |                         |                     |             |    |      |                  |          |         |          |
| 1q43                        | 1:241860596    | <i>EXO1</i>             | <i>EXO1, FH</i>     | rs4149909   | G  | 0.03 | 1.13 (1.08-1.18) | 1.16E-08 | 0.265   | 1.03     |
| 1q44                        | 1:244151650    | <i>ZBTB18, C1orf100</i> | <i>ZBTB18, AKT3</i> | rs2183478   | G  | 0.18 | 1.07 (1.05-1.09) | 1.75E-11 | 0.774   | 1.57     |
| 1q44                        | 1:248897507    | <i>PGBD2</i>            | <i>ZNF692</i>       | rs4335411   | A  | 0.76 | 1.06 (1.04-1.08) | 4.12E-10 | 0.376   | 0.98     |
| 2p14                        | 2:66863235     | <i>MEIS1</i>            | <i>MEIS1</i>        | rs17631680  | C  | 0.10 | 0.93 (0.91-0.95) | 1.93E-10 | 0.127   | 0.96     |
| 2q11.2                      | 2:99454113     | <i>REV1</i>             | <i>REV1</i>         | rs13392042  | G  | 0.58 | 1.05 (1.03-1.06) | 4.21E-11 | 0.217   | 1.21     |
| 2q33.3                      | 2:207258660    | <i>MYOSLID, KLF7</i>    | <i>MYOSLID</i>      | rs10804157  | C  | 0.44 | 1.04 (1.03-1.05) | 1.04E-08 | 0.143   | 0.87     |
| 2q37.3                      | 2:241720139    | <i>ING5</i>             | <i>ING5</i>         | rs34766121  | T  | 0.24 | 1.06 (1.04-1.08) | 5.02E-10 | 0.278   | 1.03     |
| 3p26.1                      | 3:4674530      | <i>ITPR1</i>            | <i>ITPR1</i>        | rs3804984   | C  | 0.38 | 0.95 (0.93-0.96) | 8.06E-15 | 0.021   | 1.42     |
| 3p24.2                      | 3:24213259     | <i>THRB</i>             | <i>THRB</i>         | rs1010961   | A  | 0.45 | 1.04 (1.03-1.06) | 1.64E-10 | 0.109   | 0.98     |
| 3q27.2                      | 3:185807411    | <i>IGF2BP2</i>          | <i>IGF2BP2</i>      | rs13060777  | G  | 0.26 | 1.05 (1.04-1.07) | 1.14E-11 | 0.595   | 1.10     |
| 4q23                        | 4:99031559     | <i>METAP1</i>           | <i>EIF4E, ADH5</i>  | rs1037475   | G  | 0.57 | 1.04 (1.03-1.05) | 8.38E-09 | 0.707   | 0.95     |
| 5q31.1                      | 5:133099880    | <i>HSPA4</i>            | <i>HSPA4</i>        | rs4367292   | T  | 0.27 | 0.96 (0.94-0.97) | 2.49E-08 | 0.882   | 1.15     |
| 6p21.2                      | 6:36653670     | <i>CDKN1A</i>           | <i>CDKN1A</i>       | rs10456443  | A  | 0.20 | 0.95 (0.93-0.96) | 2.67E-10 | 0.039   | 0.91     |
| 6q21                        | 6:109054915    | <i>SESNI</i>            | <i>SESNI</i>        | rs11153158  | C  | 0.13 | 0.93 (0.92-0.95) | 1.05E-10 | 0.243   | 1.19     |
| 7p14.3                      | 7:33008785     | <i>FKBP9, NT5C3A</i>    | <i>NT5C3A, BBS9</i> | rs4723230   | T  | 0.80 | 1.05 (1.03-1.07) | 4.68E-08 | 0.946   | 1.03     |
| 7q31.31                     | 7:121132432    | <i>CPEDI</i>            | <i>WNT16</i>        | rs12706314  | A  | 0.53 | 1.04 (1.03-1.06) | 2.69E-10 | 0.777   | 0.89     |
| 7q32.3                      | 7:130935964    | <i>LINC-PINT</i>        | <i>LINC-PINT</i>    | rs35908158  | C  | 0.08 | 1.08 (1.05-1.10) | 1.60E-08 | 0.883   | 1.41     |
| 8p12                        | 8:30452819     | <i>RBPMS</i>            | <i>RBPMS</i>        | rs13275869  | C  | 0.49 | 0.96 (0.95-0.97) | 8.64E-09 | 0.520   | 0.98     |
| 8q24.21                     | 8:128506035    | <i>LINC00824</i>        | <i>LINC00824</i>    | rs1516980   | C  | 0.25 | 0.96 (0.94-0.97) | 2.72E-08 | 0.987   | 0.76     |
| 9q22.2                      | 9:89639982     | <i>GADD45G</i>          | <i>GADD45G</i>      | rs28508285  | G  | 0.09 | 1.07 (1.04-1.09) | 1.49E-08 | 0.362   | 1.05     |
| 10p12.31                    | 10:21517903    | <i>SKIDA1</i>           | <i>DNAJC1</i>       | rs946711    | C  | 0.33 | 1.05 (1.03-1.06) | 2.96E-10 | 0.460   | 0.96     |
| 10q23.31                    | 10:88331783    | <i>RNLS</i>             | <i>RNLS</i>         | rs1426619   | T  | 0.45 | 1.04 (1.03-1.06) | 4.92E-09 | 0.653   | 1.09     |
| 11q23.2                     | 11:112703765   | <i>LOC1053694962</i>    | <i>LOC105369496</i> | rs10891420  | C  | 0.42 | 1.05 (1.03-1.06) | 1.38E-10 | 0.019   | 1.16     |
| 15q23                       | 15:67922458    | <i>SKOR1</i>            | <i>PIAS1</i>        | rs12148374  | C  | 0.44 | 0.96 (0.95-0.97) | 1.37E-09 | 0.832   | 1.10     |
| 16q12.1                     | 16:50059327    | <i>HEATR3</i>           | <i>BRD7</i>         | rs12599260  | A  | 0.73 | 1.05 (1.04-1.07) | 1.09E-11 | 0.002   | 1.08     |
| 16q12.1                     | 16:51447685    | <i>AC007344.1</i>       | <i>AC007344.1</i>   | rs66998222  | A  | 0.19 | 0.94 (0.93-0.96) | 7.53E-12 | 0.345   | 0.79     |
| 17p12                       | 17:12652500    | <i>MYOCD</i>            | <i>MYOCD</i>        | rs12601765  | T  | 0.30 | 1.04 (1.03-1.06) | 3.08E-08 | 0.400   | 1.17     |
| 19p12                       | 19:22032639    | <i>ZNF257</i>           | <i>ZNF257</i>       | rs8105767   | G  | 0.30 | 1.05 (1.03-1.06) | 2.63E-09 | 0.143   | 1.15     |
| 20q13.31                    | 20:57441016    | <i>CTCF</i>             | <i>RBM38, BMP7</i>  | rs13039273  | C  | 0.46 | 1.04 (1.03-1.06) | 3.08E-09 | 0.874   | 1.22     |
| 20q13.33                    | 20:63638397    | <i>STMN3</i>            | <i>SLC2A4RG</i>     | rs75691080  | T  | 0.10 | 0.92 (0.90-0.95) | 7.79E-11 | 0.044   | 1.25     |
| 21q22.12                    | 21:35072824    | <i>RUNX1</i>            | <i>RUNX1</i>        | rs2834747   | G  | 0.30 | 0.96 (0.94-0.97) | 1.44E-08 | 0.711   | 1.17     |
| 22q12.3                     | 22:36287509    | <i>MYH9, APOL1</i>      | <i>MYH9</i>         | rs9610482   | T  | 0.19 | 1.06 (1.04-1.08) | 7.89E-11 | 0.354   | 0.94     |
| <i>Novel loci in META-2</i> |                |                         |                     |             |    |      |                  |          |         |          |
| 2p11.2                      | 2:86458018     | <i>KDM3A</i>            | <i>KDM3A</i>        | rs573520030 | T  | 0.99 | 0.62 (0.53-0.74) | 3.87E-08 | 0.918   | 1.83     |
| 4p11                        | 4:49085558     | <i>CWH43</i>            | <i>OCIAD1</i>       | rs538533131 | A  | 0.99 | 0.53 (0.43-0.65) | 2.61E-09 | 0.002   | 1.15     |
| 10q25.1                     | 10:106821670   | <i>SORCS1</i>           | <i>SORCS1</i>       | rs12247648  | T  | 0.03 | 1.26 (1.17-1.36) | 3.86E-09 | 0.825   | 39.55    |
| Xp11.23                     | X:46904059     | <i>JADE3, RP2</i>       | <i>SLC9A7</i>       | rs6611312   | T  | 0.53 | 1.05 (1.03-1.07) | 2.54E-08 | 0.355   | 1.07     |

5 Chr, chromosome; Pos, position (build 38); EA, effect allele; EAF, effect allele frequency; OR, odds ratio; CI, confidence interval; P, p-value; HetPVal, p-value for heterogeneity; FIN enr,  
 6 Finnish enrichment (calculated as FIN AF / NFEE AF in the Genome Aggregation Database (gnomAD), where FIN AF is the Finnish allele frequency and NFEE AF is the non-Finnish-non-  
 7 Estonian European allele frequency). 'Nearest gene(s)' reports the gene closest to the association lead variant. 'Candidate gene(s)' indicates the biologically most relevant gene within 1Mb  
 8 window around the association lead variant.

9

190 **Figure 1. A combined Manhattan plot of UL associations in META-1 and META-2.**

191 We conducted UL GWAS in FinnGen and, subsequently, two sets of meta-analyses with data  
192 from a previously published UL meta-analysis<sup>2</sup> and the UK Biobank, adding up to 53,534 UL  
193 cases and 373,024 female controls in META-1 (top) and 33,244 UL cases and 311,271  
194 female controls in META-2 (bottom), respectively. Blue color denotes novel UL risk loci  
195 identified in META-1, and red color indicates novel loci identified in META-2 that were not  
196 associated previously with UL risk in prior GWASs or META-1. Black and grey colours  
197 indicate odd and even chromosome numbers, respectively. The red dashed lines correspond  
198 to the threshold for genome-wide significance ( $p < 5 \times 10^{-8}$ ).

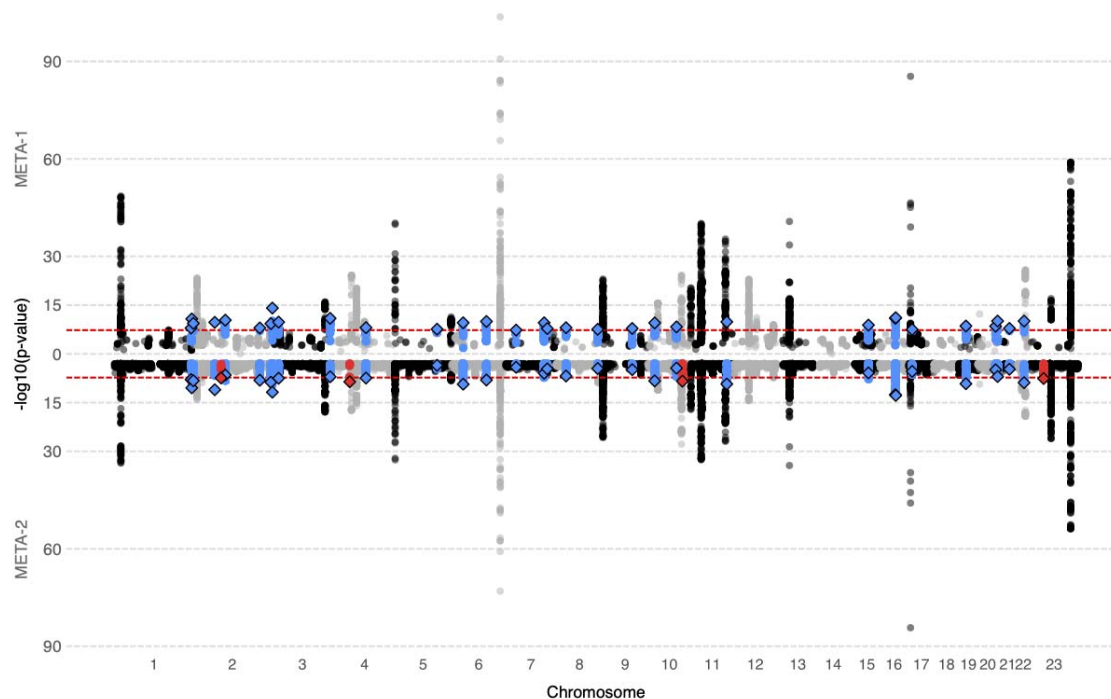

199 **Figure 2. Variant summary and gene set-based results using summary statistics from**  
 200 **META-2.**

201 A) The proportions of ‘independent genome-wide significant variants’ and ‘variants in LD  
 202 with independent significant variants’ having corresponding functional annotation. Bars are  
 203 colored according to  $-\log_2(\text{enrichment})$  relative to all variants in the reference panel. B) A  
 204 Manhattan plot of the gene-based test computed by MAGMA<sup>54</sup>. The input variants were  
 205 mapped to 19,920 protein coding genes and, thus, significance was considered at  $p < 2.51 \times 10^{-6}$   
 206 ( $0.05/19,920$ ); only 87 genes with p-values below this threshold are plotted. Blue and red  
 207 colours indicate odd and even chromosome numbers, respectively. C) MAGMA<sup>54</sup> gene-set  
 208 enrichment analysis was performed for curated gene sets and GO terms available at  
 209 MsigDB<sup>55</sup>. The plot shows the results for significantly enriched pathways ( $p_{\text{Bonferroni}} < 0.05$ ).  
 210 D) Results of MAGMA<sup>54</sup> tissue expression analysis testing a positive relationship between  
 211 tissue-specific gene expression profiles and disease-gene associations. Tissue-specific gene-  
 212 expression data were from GTEx (v8)<sup>56</sup>. All data plotted in Figure 2 A-D were produced  
 213 using FUMA<sup>57</sup>.

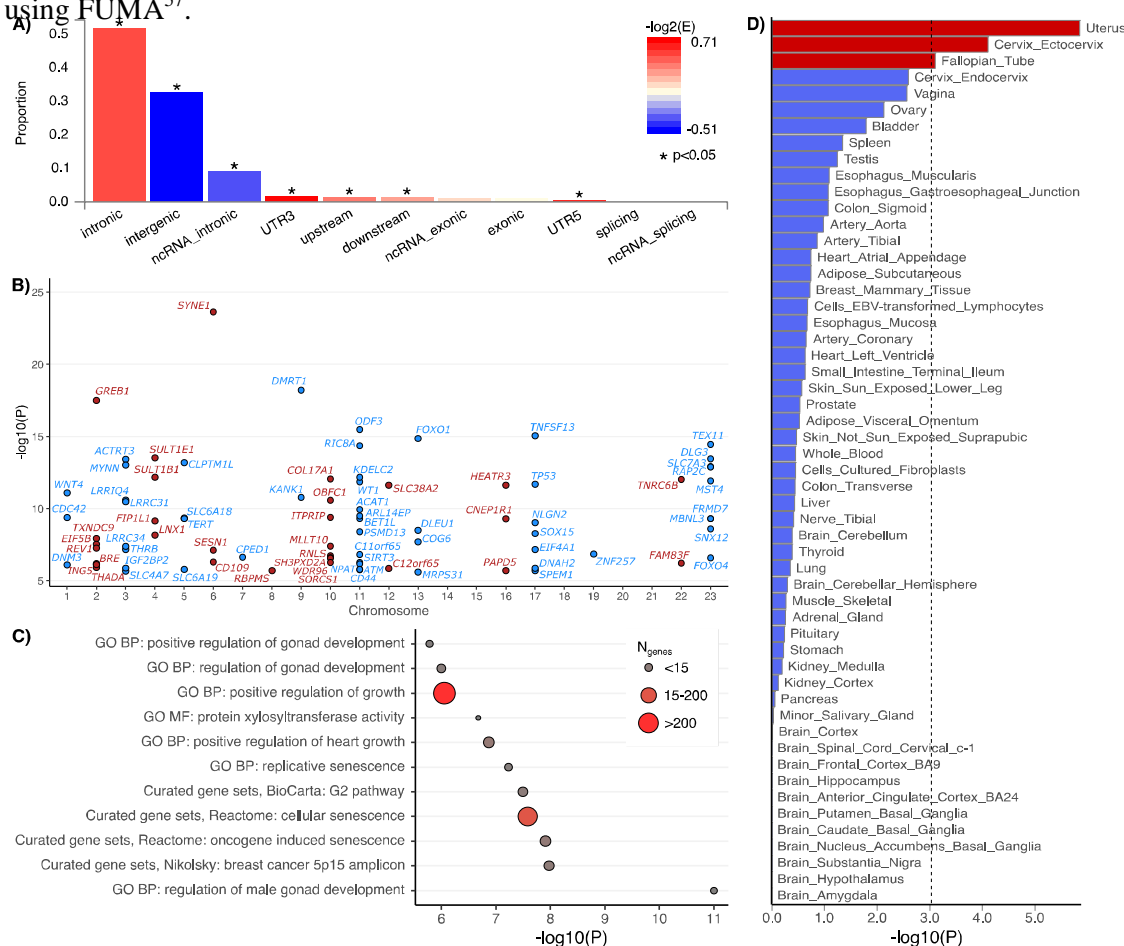

214 **Figure 3. Genetic correlations ( $r_g$ ) of UL with other traits.**

215 The analyses were completed using an automated LD score regression pipeline available at  
 216 <http://ldsc.broadinstitute.org><sup>43</sup>. Statistical significance was considered at  $p < 6 \times 10^{-5}$  (0.05/830,  
 217 where 830 is the number of traits tested). The results of traits that showed significant  $r_g$  with  
 218 UL are plotted (more results are provided in [Table S8](#)). Traits are named as reported in the  
 219 LD Hub output.

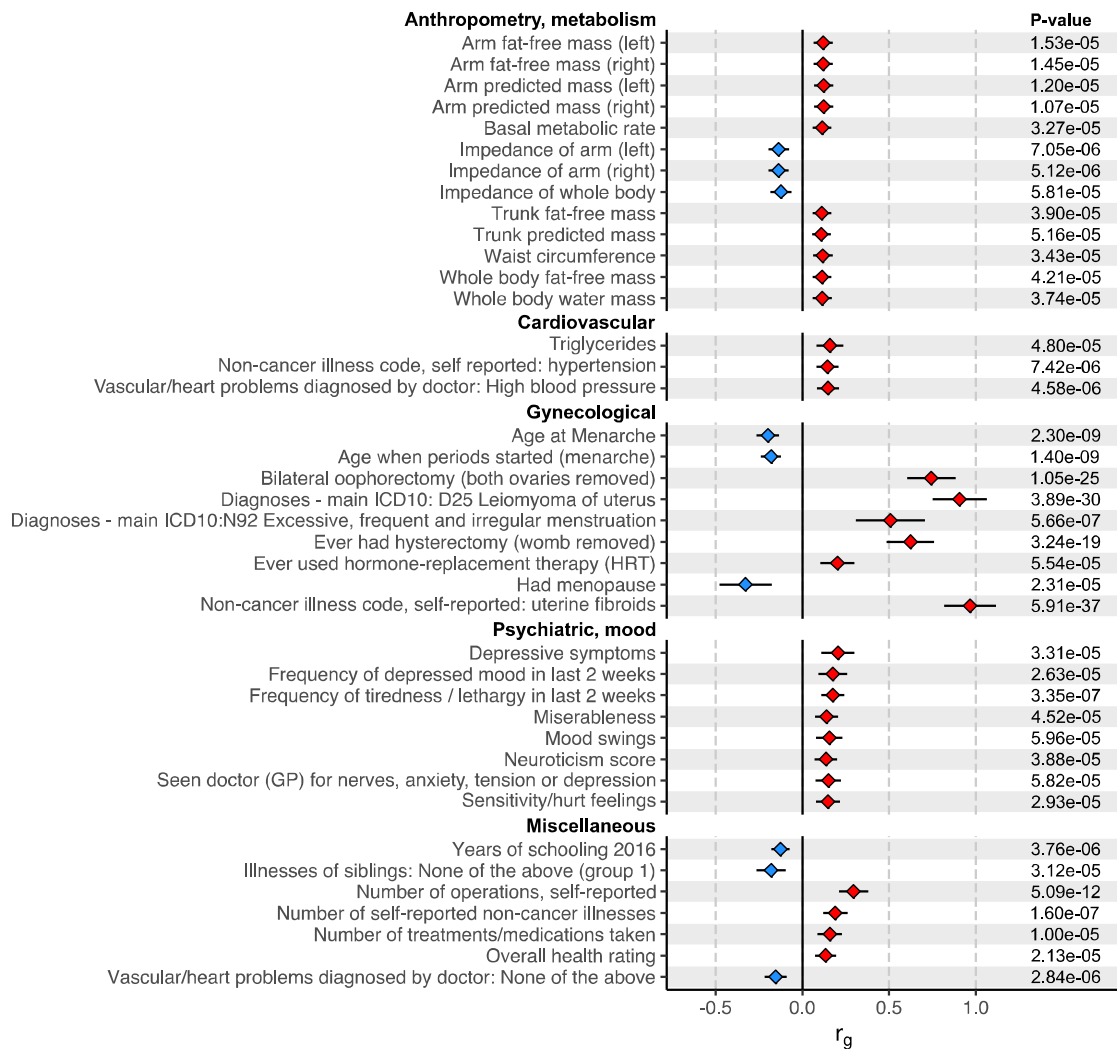



220 **Figure 4. Causal relationships between UL and body composition measures.**

221 We estimated causal relationships between UL and the key traits showing significant genetic  
 222 correlation with UL using two-sample Mendelian randomization implemented in  
 223 ‘TwoSampleMR’ R library<sup>58,59</sup>. Bi-directional causal estimates were obtained by using  
 224 summary statistics provided by the MRC Integrative Epidemiology Unit (IEU) GWAS  
 225 database and UL GWAS results obtained in FinnGen in the present study to extract genetic  
 226 instruments for other, mostly UKBB-based, traits and UL, respectively. LD pruning was  
 227 completed using European population reference, threshold of  $r^2=0.001$ , and clumping  
 228 window of 10kb. Statistical significance was considered at  $p < 3 \times 10^{-3}$  (0.05/19, where 19 is the  
 229 number of traits tested; black diamonds). The plot shows the causal estimates obtained using  
 230 inverse variance weighted method for key body composition measures (more results are  
 231 provided in [Table S9](#); the scatter plots for the body composition measures can be found in  
 232 [Figures S43-S49](#), and the results of the leave-one-out sensitivity analyses are shown in  
 233 [Figures S50-S56](#).

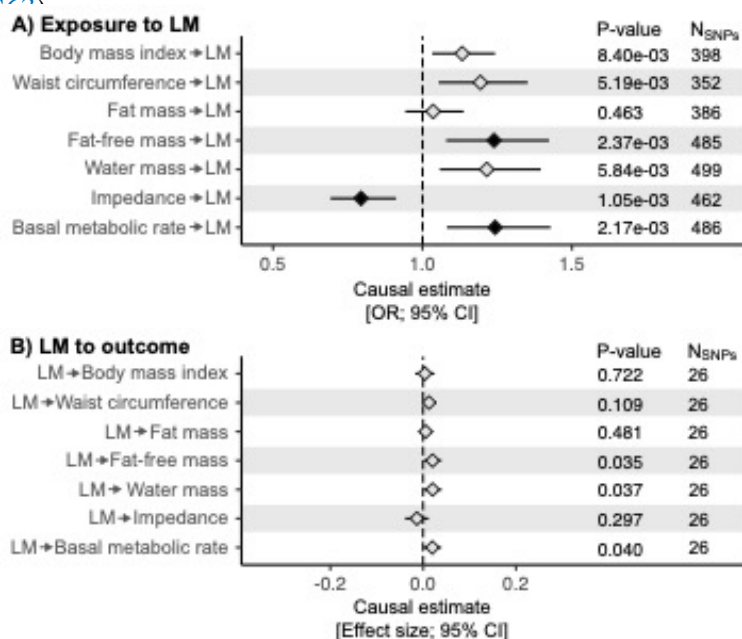

## 234 **Methods**

### 235 *Study populations*

236 **FinnGen** ([www.finnngen.fi/en](http://www.finnngen.fi/en)) is a public-private partnership project launched in 2017 with  
237 an aim to improve human health through genetic research. The project utilizes genome  
238 information from a nationwide network of Finnish biobanks that are linked with digital health  
239 records from national hospital discharge (available from 1968), death (1969-), cancer (1953-  
240 ), and medication reimbursement (1995-) registries using the unique national personal  
241 identification codes. Ultimately, the data resource will cover roughly 10% of the Finnish  
242 population. We studied data from 123,579 female participants (18,060 UL cases and 105,519  
243 female controls) from FinnGen Preparatory Phase Data Freeze 5. UL cases were required to  
244 have an entry of ICD-10: D25, ICD-9: 218, or ICD-8: 21899, and participants who had no  
245 records of these entries were deemed as controls. The Coordinating Ethics Committee of the  
246 Hospital District of Helsinki and Uusimaa (HUS) approved the FinnGen study protocol Nr  
247 HUS/990/2017.

248 The FinnGen study is approved by Finnish Institute for Health and Welfare (THL), approval  
249 number THL/2031/6.02.00/2017, amendments THL/1101/5.05.00/2017,  
250 THL/341/6.02.00/2018, THL/2222/6.02.00/2018, THL/283/6.02.00/2019,  
251 THL/1721/5.05.00/2019, Digital and population data service agency VRK43431/2017-3,  
252 VRK/6909/2018-3, VRK/4415/2019-3 the Social Insurance Institution (KELA) KELA  
253 58/522/2017, KELA 131/522/2018, KELA 70/522/2019, KELA 98/522/2019, and Statistics  
254 Finland TK-53-1041-17.

255 The Biobank Access Decisions for FinnGen samples and data utilized in FinnGen Data  
256 Freeze 5 include: THL Biobank BB2017\_55, BB2017\_111, BB2018\_19, BB\_2018\_34,  
257 BB\_2018\_67, BB2018\_71, BB2019\_7, BB2019\_8, BB2019\_26, Finnish Red Cross Blood  
258 Service Biobank 7.12.2017, Helsinki Biobank HUS/359/2017, Auria Biobank AB17-5154,  
259 Biobank Borealis of Northern Finland\_2017\_1013, Biobank of Eastern Finland 1186/2018,  
260 Finnish Clinical Biobank Tampere MH0004, Central Finland Biobank 1-2017, and  
261 Terveystalo Biobank STB 2018001.

262 **FibroGENE** is consortium of conventional, population-based and direct-to-consumer cohorts  
263 that was assembled to replicate and identify UL risk variants. In the study by Gallagher *et al.*,  
264 they studied data from 35,474 UL cases and 267,505 female controls including participants  
265 from four population-based cohorts (Women's Genome Health Study, WGHS; Northern  
266 Finland Birth Cohort, NFBC; QIMR Berghofer Medical Research Institute, QIMR; the UK  
267 Biobank, UKBB) and one direct-to-consumer cohort (23andMe) Detailed descriptions of  
268 cohorts and sample selections are available in Supplementary Methods<sup>2</sup>.

269 **The UK Biobank** is a large national and international health resource following the health  
270 and wellbeing of 500,000 male and female volunteer participants, enrolled at ages from 40 to  
271 69<sup>60</sup>. The study began in 2006 with the aim to follow the participants for at least 30 years  
272 thereafter. Information has been collected from participants during recruitment using  
273 questionnaires on socioeconomic status, lifestyle, family history and medical history.  
274 Participants have also been followed up for cause-specific morbidity and mortality through  
275 linkage to disease registries, death registries, and hospital admission records. For this study,  
276 altogether 220,936 women of European ancestry were considered. Based on both hospital-  
277 linked medical records and self-report (interview with research nurse), women with a history  
278 of UL were selected as cases (n=15,184), while controls (n=205,752) had no previous history  
279 of UL. Informed consent was obtained from all participants. The UKBB project is approved  
280 by the North West Multi-Centre Research Ethics Committee.

## 281 *Genotyping, imputation, and quality control*

282 In FinnGen, genotyping of the samples was performed using Illumina and Affymetrix arrays  
283 (Illumina Inc., San Diego, and Thermo Fisher Scientific, Santa Clara, CA, USA). Sample  
284 quality control (QC) was performed to exclude individuals with high genotype missingness  
285 (>5%), ambiguous gender, excess heterozygosity ( $\pm 4SD$ ) and non-Finnish ancestry.  
286 Regarding variant QC, all variants with low Hardy-Weinberg equilibrium (HWE) p-value  
287 ( $< 1e-6$ ), high missingness (>2%) and minor allele count (MAC) $< 3$  were excluded. Chip  
288 genotyped samples were pre-phased with Eagle 2.3.5 with the number of conditioning  
289 haplotypes set to 20,000. Genotype imputation was carried out by using the Finnish  
290 population-specific SISu v3 reference panel with Beagle 4.1 (version 08Jun17.d8b) as  
291 described in the following protocol: [dx.doi.org/10.17504/protocols.io.nmndc5e](https://dx.doi.org/10.17504/protocols.io.nmndc5e). In post-  
292 imputation QC, variants with imputation INFO $< 0.6$  were excluded.

293 In UK Biobank, genotyping of samples was performed either on the Affymetrix UK BiLEVE  
294 or Affymetrix UK Biobank Axiom array. The UK Biobank genotype data passed centralised  
295 quality control and was imputed by the UKBB team up to the HRC reference panel<sup>61</sup>.

## 296 *GWAS*

297 The UL GWAS in FinnGen was completed using the Scalable and Accurate Implementation  
298 of Generalized (SAIGE) software<sup>62</sup>. The association models were adjusted for age, sex, the  
299 first 10 genetic principal components, and genotyping batch, and only variants with minimum  
300 allele count of 5 were included in the analysis.

301 Given the extensive relatedness in the UK Biobank data, a linear mixed model (LMM) was  
302 utilised for association testing that accounts for population structure and model the related  
303 individuals, including genotyping array, age and BMI as covariates as implemented in Bolt-  
304 LMM V2.3.

## 305 *Meta-analyses*

306 Two sets of fixed-effect, inverse-variance weighted meta-analyses (implemented in  
307 METAL<sup>63</sup>) were performed: the results obtained in FinnGen were meta-analyzed with 1) the  
308 top 10,000 most significant variants associating with UL in a published GWAS<sup>2</sup> (META-1)  
309 and 2) UL GWAS results obtained in the UKBB. Statistical significance was considered at  
310 the standard genome-wide significance level ( $p < 5 \times 10^{-8}$ ). Genomic inflation factor was  
311 estimated using an automated LD score (LDSC) regression pipeline<sup>43</sup>.

## 312 *Characterization of association signals*

313 We used a web-based platform FUMA<sup>57</sup> to perform functional annotations of the GWAS  
314 results: we completed functional gene mapping and gene-based association and enrichment  
315 tests using the genome-wide UL associations from META-2 (FinnGen and UKBB) and  
316 predefined lead variants as reported in Table S2. FUMA identifies variants showing genome-  
317 wide significant association ( $p < 5 \times 10^{-8}$ ) with the study trait and, among the significant  
318 variants, identifies variants in low LD ( $r^2 < 0.6$ ) as 'independent significant variants' and  
319 further identifies variants in LD ( $r^2 > 0.6$ ) with the 'independent significant variants';  
320 ANNOVAR<sup>64</sup> annotations are performed for all these variants to obtain information on the  
321 functional consequences of the key variants. MAGMA<sup>54</sup>, also implemented in FUMA, was  
322 used to perform gene-based association testing and gene-set enrichment analyses: gene-based  
323 p-values were computed for protein-coding genes by mapping variants to genes and  
324 subsequent enrichment analyses were performed for the significant genes using 4728 curated  
325 gene sets and 6166 GO terms as reported in MsigDB<sup>55</sup>.

326 To further characterize the potential UL candidate gene(s) according to biological relevance,  
327 we annotated all genes within  $\pm 1\text{Mb}$  window from the association lead variant. We explored  
328 information provided by GenBank<sup>37</sup> and UniProt<sup>65</sup> to determine functions of the genes. To  
329 complement the information available in these databases, a broad literature search was  
330 performed to identify previous work published regarding to the genes of interest.

331 In each locus, we explored the associations of the lead variant with gene expression levels in  
332 the Genotype-Tissue Expression (GTEx) Portal; GTEx was accessed during 02/10/2021-  
333 02/11/2021. To further test if altered gene expression mediates UL risk associations, we used  
334 a method proposed by Zhu *et al.*<sup>66</sup> as implemented in Complex Traits Genetics Virtual Lab  
335 (CTG-VL)<sup>67</sup>; we performed these tests using genome-wide UL results from META-2 and  
336 tissue-specific gene expression data (GTEx, V7) for uterus and whole blood. We further used  
337 RegulomeDB<sup>33</sup> to discover regulatory elements overlapping with the intergenic variants in  
338 the novel loci showing genome-wide significant association with UL risk. Here, significant  
339 results for the novel loci are reported.

#### 340 *SNP-based heritability and genetic correlations*

341 The SNP-based heritability ( $h^2_{\text{SNP}}$ ) of UL was estimated using LDSC regression implemented  
342 in LDSC software<sup>68</sup>. Population prevalence of 0.30 (as in <sup>2</sup>) and sample prevalence of 0.11  
343 were used to estimate  $h^2_{\text{SNP}}$  on liability scale. We further applied LDSC to estimate genetic  
344 correlation ( $r_g$ ) of UL with other traits using LD Hub<sup>43</sup>, a web interface for performing  
345 automated LDSC regression. As recommended, we excluded the major histocompatibility  
346 complex region from the analyses<sup>43</sup>. We tested  $r_g$  between UL and all 830 traits available in  
347 the LD Hub database and, thus, statistical significance was considered at  $p < 6 \times 10^{-5}$   
348 (0.05/830).

#### 349 *Mendelian randomization*

350 To test for causal inferences between UL and the key traits showing significant  $r_g$  with UL,  
351 we performed bi-directional two-sample Mendelian randomization. These analyses were  
352 completed using ‘TwoSampleMR’ R library<sup>58</sup> (<https://mrcieu.github.io/TwoSampleMR/>). To  
353 avoid possible bias from overlapping samples, we extracted genetic instruments for UL from  
354 the GWAS results obtained in FinnGen, and for other traits from the GWAS database  
355 provided by the MRC Integrative Epidemiology Unit (IEU) available at  
356 <https://gwas.mrcieu.ac.uk/> and integrated in TwoSampleMR. LD pruning was completed  
357 using European population reference, threshold of  $r^2 = 0.001$ , and clumping window of 10kb,  
358 as set as default in ‘clump\_data’ function; the numbers of SNPs available for the analyses are  
359 listed in [Table S9](#). Inverse variance weighted (IVW) method was considered as a primary  
360 analysis, and MR Egger estimates were derived in sensitivity analyses: the estimates were  
361 required to be to a matching direction with the IVW-estimates and Egger intercepts were  
362 evaluated to assess horizontal pleiotropy. Cochran’s Q statistics were derived using  
363 ‘mr\_heterogeneity’ function to test for heterogeneity. To screen for highly influential variants  
364 that could drive the association for example due to horizontal pleiotropy, we performed  
365 leave-one-out analyses using ‘mr\_leaveoneout’ function. Statistical significance for the  
366 causal effects was considered at  $p < 3 \times 10^{-3}$  (0.05/19) to correct for 19 traits tested.

## 367 **Acknowledgements and funding**

368 The work was supported through The Sigrid Juselius Foundation (JK) and funds from the  
369 Academy of Finland [grant numbers 297338 and 307247](JK), Novo Nordisk Foundation  
370 [grant number NNF17OC0026062] (JK), and The Finnish Medical Association (OU).

371 The FinnGen project is funded by two grants from Business Finland (HUS 4685/31/2016 and  
372 UH 4386/31/2016) and eleven industry partners (AbbVie Inc, AstraZeneca UK Ltd, Biogen  
373 MA Inc, Celgene Corporation, Celgene International II Sàrl, Genentech Inc, Merck Sharp &  
374 Dohme Corp, Pfizer Inc., GlaxoSmithKline, Sanofi, Maze Therapeutics Inc., Janssen Biotech  
375 Inc). Following biobanks are acknowledged for delivering biobank samples to FinnGen:  
376 Auria Biobank ([www.auria.fi/biopankki](http://www.auria.fi/biopankki)), THL Biobank ([www.thl.fi/biobank](http://www.thl.fi/biobank)), Helsinki  
377 Biobank ([www.helsinginbiopankki.fi](http://www.helsinginbiopankki.fi)), Biobank Borealis of Northern Finland  
378 ([https://www.ppsHP.fi/Tutkimus-ja-opetus/Biopankki/Pages/Biobank-Borealis-briefly-in-](https://www.ppsHP.fi/Tutkimus-ja-opetus/Biopankki/Pages/Biobank-Borealis-briefly-in-English.aspx)  
379 [English.aspx](https://www.ppsHP.fi/Tutkimus-ja-opetus/Biopankki/Pages/Biobank-Borealis-briefly-in-English.aspx)), Finnish Clinical Biobank Tampere ([www.tays.fi/en-](http://www.tays.fi/en-US/Research%20and%20development/Finnish%20Clinical%20Biobank%20Tampere)  
380 [US/Research and development/Finnish Clinical Biobank Tampere](http://www.tays.fi/en-US/Research%20and%20development/Finnish%20Clinical%20Biobank%20Tampere)), Biobank of Eastern  
381 Finland ([www.ita-suomenbiopankki.fi/en](http://www.ita-suomenbiopankki.fi/en)), Central Finland Biobank ([www.ksshp.fi/fi-](http://www.ksshp.fi/fi-FI/Potilaille/Biopankki)  
382 [FI/Potilaille/Biopankki](http://www.ksshp.fi/fi-FI/Potilaille/Biopankki)), Finnish Red Cross Blood Service Biobank  
383 ([www.veripalvelu.fi/verenluovutus/biopankkitoiminta](http://www.veripalvelu.fi/verenluovutus/biopankkitoiminta)) and Terveystalo Biobank  
384 ([www.terveystalo.com/fi/Yritystietoa/Terveystalo-Biopankki/Biopankki/](http://www.terveystalo.com/fi/Yritystietoa/Terveystalo-Biopankki/Biopankki/)). All Finnish  
385 Biobanks are members of BBMRI.fi infrastructure ([www.bbmri.fi](http://www.bbmri.fi)).

386 This research has been conducted using data from UK Biobank, a major biomedical database,  
387 (<http://www.ukbiobank.ac.uk/>) under project ID 9637 (Gallagher et al., 2019).

388 The Genotype-Tissue Expression (GTEx) Project was supported by the Common Fund of the  
389 Office of the Director of the National Institutes of Health, and by NCI, NHGRI, NHLBI,  
390 NIDA, NIMH, and NINDS. The data used for the analyses described in this manuscript were  
391 obtained from the GTEx Portal on 02/10/2021-02/11/2021.

## 392 **Author contributions**

393 OU conceptualized the study. ES, NR, KTZ, CMB, and JK contributed to the analysis plan.  
394 ES, JT and NR analyzed data and generated results. ES, JT, NR, KTZ, and OU interpreted  
395 the results. ES and OU wrote the original manuscript. JK supervised the study, obtained  
396 funding and provided additional study resources. All authors contributed to revising the  
397 content of the manuscript and approved the final version.

## 398 **Competing interests**

399 KTZ: Competing financial interests: Scientific collaborations (grant funding) with Bayer AG,  
400 Roche Diagnostics Inc, MDNA Life Sciences, and Evotec. Competing non-financial  
401 interests: Board memberships of the World Endometriosis Society, World Endometriosis  
402 Research Foundation, and research advisory committee member of Wellbeing of Women  
403 UK.

404 CMB: Competing financial interests: Scientific collaborations (grant funding) with Bayer  
405 AG, Roche Diagnostics Inc, MDNA Life Sciences, and Evotec. Scientific board Myovant;  
406 IDDM Member ObsEva. Competing non-financial interests: Chair ESHRE Endometriosis  
407 Guideline Development Group.

## 408 References

- 409 1 Baird, D. D., Dunson, D. B., Hill, M. C., Cousins, D. & Schectman, J. M. High cumulative  
410 incidence of uterine leiomyoma in black and white women: ultrasound evidence. *Am. J.*  
411 *Obstet. Gynecol.* **188**, 100-107 (2003).
- 412 2 Gallagher, C. S. *et al.* Genome-wide association and epidemiological analyses reveal  
413 common genetic origins between uterine leiomyomata and endometriosis. *Nat Commun* **10**,  
414 4857, doi:10.1038/s41467-019-12536-4 (2019).
- 415 3 Abdul Ghaffar, N. A., Ismail, M. P., Nik Mahmood, N. M., Daud, K. & Abu Dzarr, G. A.  
416 Huge uterine fibroid in a postmenopausal woman associated with polycythaemia: a case  
417 report. *Maturitas* **60**, 177-179, doi:10.1016/j.maturitas.2008.03.013 (2008).
- 418 4 Stewart, E. A. *et al.* Uterine fibroids. *Nat Rev Dis Primers* **2**, 16043,  
419 doi:10.1038/nrdp.2016.43 (2016).
- 420 5 Stewart, E. A., Cookson, C. L., Gandolfo, R. A. & Schulze-Rath, R. Epidemiology of uterine  
421 fibroids: a systematic review. *BJOG* **124**, 1501-1512, doi:10.1111/1471-0528.14640 (2017).
- 422 6 Pavone, D., Clemenza, S., Sorbi, F., Fambrini, M. & Petraglia, F. Epidemiology and Risk  
423 Factors of Uterine Fibroids. *Best Pract. Res. Clin. Obstet. Gynaecol.* **46**, 3-11,  
424 doi:10.1016/j.bpobgyn.2017.09.004 (2018).
- 425 7 Van Voorhis, B. J., Romitti, P. A. & Jones, M. P. Family history as a risk factor for  
426 development of uterine leiomyomas. Results of a pilot study. *J. Reprod. Med.* **47**, 663-669  
427 (2002).
- 428 8 Luoto, R. *et al.* Heritability and risk factors of uterine fibroids--the Finnish Twin Cohort  
429 study. *Maturitas* **37**, 15-26 (2000).
- 430 9 Treloar, S. A., Martin, N. G., Dennerstein, L., Raphael, B. & Heath, A. C. Pathways to  
431 hysterectomy: insights from longitudinal twin research. *Am. J. Obstet. Gynecol.* **167**, 82-88,  
432 doi:10.1016/s0002-9378(11)91632-9 (1992).
- 433 10 Wise, L. A. *et al.* African ancestry and genetic risk for uterine leiomyomata. *Am. J.*  
434 *Epidemiol.* **176**, 1159-1168, doi:10.1093/aje/kws276 (2012).
- 435 11 Mehine, M., Makinen, N., Heinonen, H. R., Aaltonen, L. A. & Vahteristo, P. Genomics of  
436 uterine leiomyomas: insights from high-throughput sequencing. *Fertil. Steril.* **102**, 621-629,  
437 doi:10.1016/j.fertnstert.2014.06.050 (2014).
- 438 12 Cha, P. C. *et al.* A genome-wide association study identifies three loci associated with  
439 susceptibility to uterine fibroids. *Nat. Genet.* **43**, 447-450, doi:10.1038/ng.805 (2011).
- 440 13 Eggert, S. L. *et al.* Genome-wide linkage and association analyses implicate FASN in  
441 predisposition to Uterine Leiomyomata. *Am. J. Hum. Genet.* **91**, 621-628,  
442 doi:10.1016/j.ajhg.2012.08.009 (2012).
- 443 14 Hellwege, J. N. *et al.* A multi-stage genome-wide association study of uterine fibroids in  
444 African Americans. *Hum. Genet.* **136**, 1363-1373, doi:10.1007/s00439-017-1836-1 (2017).
- 445 15 Valimaki, N. *et al.* Genetic predisposition to uterine leiomyoma is determined by loci for  
446 genitourinary development and genome stability. *Elife* **7**, doi:10.7554/eLife.37110 (2018).
- 447 16 Rafnar, T. *et al.* Variants associating with uterine leiomyoma highlight genetic background  
448 shared by various cancers and hormone-related traits. *Nat Commun* **9**, 3636,  
449 doi:10.1038/s41467-018-05428-6 (2018).
- 450 17 Sakai, K. *et al.* Identification of a novel uterine leiomyoma GWAS locus in a Japanese  
451 population. *Sci. Rep.* **10**, 1197, doi:10.1038/s41598-020-58066-8 (2020).
- 452 18 Sepulveda, P. V., Bush, E. D. & Baar, K. Pharmacology of manipulating lean body mass.  
453 *Clin. Exp. Pharmacol. Physiol.* **42**, 1-13, doi:10.1111/1440-1681.12320 (2015).

- 454 19 Ono, M. *et al.* Paracrine activation of WNT/beta-catenin pathway in uterine leiomyoma stem  
455 cells promotes tumor growth. *Proc. Natl. Acad. Sci. U. S. A.* **110**, 17053-17058,  
456 doi:10.1073/pnas.1313650110 (2013).
- 457 20 Willert, K. & Nusse, R. Wnt proteins. *Cold Spring Harb. Perspect. Biol.* **4**, a007864,  
458 doi:10.1101/cshperspect.a007864 (2012).
- 459 21 Borahay, M. A. *et al.* Estrogen Receptors and Signaling in Fibroids: Role in Pathobiology and  
460 Therapeutic Implications. *Reprod. Sci.* **24**, 1235-1244, doi:10.1177/1933719116678686  
461 (2017).
- 462 22 Massaad-Massade, L. *et al.* HMGA1 enhances the transcriptional activity and binding of the  
463 estrogen receptor to its responsive element. *Biochemistry* **41**, 2760-2768,  
464 doi:10.1021/bi011455j (2002).
- 465 23 Dhamad, A. E., Zhou, Z., Zhou, J. & Du, Y. Systematic Proteomic Identification of the Heat  
466 Shock Proteins (Hsp) that Interact with Estrogen Receptor Alpha (ERalpha) and Biochemical  
467 Characterization of the ERalpha-Hsp70 Interaction. *PLoS One* **11**, e0160312,  
468 doi:10.1371/journal.pone.0160312 (2016).
- 469 24 Prossnitz, E. R. *et al.* Estrogen signaling through the transmembrane G protein-coupled  
470 receptor GPR30. *Annu. Rev. Physiol.* **70**, 165-190,  
471 doi:10.1146/annurev.physiol.70.113006.100518 (2008).
- 472 25 Ciarmela, P. *et al.* Growth factors and myometrium: biological effects in uterine fibroid and  
473 possible clinical implications. *Hum. Reprod. Update* **17**, 772-790,  
474 doi:10.1093/humupd/dmr031 (2011).
- 475 26 Peng, L. *et al.* Expression of insulin-like growth factors (IGFs) and IGF signaling: molecular  
476 complexity in uterine leiomyomas. *Fertil. Steril.* **91**, 2664-2675,  
477 doi:10.1016/j.fertnstert.2007.10.083 (2009).
- 478 27 Perrot, V. & Rechler, M. M. The coactivator p300 directly acetylates the forkhead  
479 transcription factor Foxo1 and stimulates Foxo1-induced transcription. *Mol. Endocrinol.* **19**,  
480 2283-2298, doi:10.1210/me.2004-0292 (2005).
- 481 28 Guo, S. *et al.* Phosphorylation of serine 256 by protein kinase B disrupts transactivation by  
482 FKHR and mediates effects of insulin on insulin-like growth factor-binding protein-1  
483 promoter activity through a conserved insulin response sequence. *J. Biol. Chem.* **274**, 17184-  
484 17192, doi:10.1074/jbc.274.24.17184 (1999).
- 485 29 Lewis, T. D. *et al.* Ulipristal acetate decreases active TGF-beta3 and its canonical signaling in  
486 uterine leiomyoma via two novel mechanisms. *Fertil. Steril.* **111**, 806-815 e801,  
487 doi:10.1016/j.fertnstert.2018.12.026 (2019).
- 488 30 Chen, J., Kitchen, C. M., Streb, J. W. & Miano, J. M. Myocardin: a component of a molecular  
489 switch for smooth muscle differentiation. *J. Mol. Cell. Cardiol.* **34**, 1345-1356,  
490 doi:10.1006/jmcc.2002.2086 (2002).
- 491 31 Liao, X. H. *et al.* ERalpha inhibited myocardin-induced differentiation in uterine fibroids.  
492 *Exp. Cell Res.* **350**, 73-82, doi:10.1016/j.yexcr.2016.11.007 (2017).
- 493 32 Zhao, J. *et al.* MYOSLID Is a Novel Serum Response Factor-Dependent Long Noncoding  
494 RNA That Amplifies the Vascular Smooth Muscle Differentiation Program. *Arterioscler.*  
495 *Thromb. Vasc. Biol.* **36**, 2088-2099, doi:10.1161/ATVBAHA.116.307879 (2016).
- 496 33 Boyle, A. P. *et al.* Annotation of functional variation in personal genomes using  
497 RegulomeDB. *Genome Res.* **22**, 1790-1797, doi:10.1101/gr.137323.112 (2012).
- 498 34 Raimundo, N., Vanharanta, S., Aaltonen, L. A., Hovatta, I. & Suomalainen, A.  
499 Downregulation of SRF-FOS-JUNB pathway in fumarate hydratase deficiency and in uterine  
500 leiomyomas. *Oncogene* **28**, 1261-1273, doi:10.1038/onc.2008.472 (2009).

- 501 35 Edwards, T. L., Hartmann, K. E. & Velez Edwards, D. R. Variants in BET1L and TNRC6B  
502 associate with increasing fibroid volume and fibroid type among European Americans. *Hum.*  
503 *Genet.* **132**, 1361-1369, doi:10.1007/s00439-013-1340-1 (2013).
- 504 36 Masuda, T. *et al.* GWAS of five gynecologic diseases and cross-trait analysis in Japanese.  
505 *Eur. J. Hum. Genet.* **28**, 95-107, doi:10.1038/s41431-019-0495-1 (2020).
- 506 37 Clark, K., Karsch-Mizrachi, I., Lipman, D. J., Ostell, J. & Sayers, E. W. GenBank. *Nucleic*  
507 *Acids Res.* **44**, D67-72, doi:10.1093/nar/gkv1276 (2016).
- 508 38 Mehine, M. *et al.* Integrated data analysis reveals uterine leiomyoma subtypes with distinct  
509 driver pathways and biomarkers. *Proc. Natl. Acad. Sci. U. S. A.* **113**, 1315-1320,  
510 doi:10.1073/pnas.1518752113 (2016).
- 511 39 Kimura, Y., Morita, T., Hayashi, K., Miki, T. & Sobue, K. Myocardin functions as an  
512 effective inducer of growth arrest and differentiation in human uterine leiomyosarcoma cells.  
513 *Cancer Res.* **70**, 501-511, doi:10.1158/0008-5472.CAN-09-1469 (2010).
- 514 40 Markowski, D. N. *et al.* HMGA2 and the p19Arf-TP53-CDKN1A axis: a delicate balance in  
515 the growth of uterine leiomyomas. *Genes Chromosomes Cancer* **49**, 661-668,  
516 doi:10.1002/gcc.20777 (2010).
- 517 41 Staley, J. R. *et al.* PhenoScanner: a database of human genotype-phenotype associations.  
518 *Bioinformatics* **32**, 3207-3209, doi:10.1093/bioinformatics/btw373 (2016).
- 519 42 Kamat, M. A. *et al.* PhenoScanner V2: an expanded tool for searching human genotype-  
520 phenotype associations. *Bioinformatics* **35**, 4851-4853, doi:10.1093/bioinformatics/btz469  
521 (2019).
- 522 43 Zheng, J. *et al.* LD Hub: a centralized database and web interface to perform LD score  
523 regression that maximizes the potential of summary level GWAS data for SNP heritability  
524 and genetic correlation analysis. *Bioinformatics* **33**, 272-279,  
525 doi:10.1093/bioinformatics/btw613 (2017).
- 526 44 Marshall, L. M. *et al.* Risk of uterine leiomyomata among premenopausal women in relation  
527 to body size and cigarette smoking. *Epidemiology* **9**, 511-517 (1998).
- 528 45 Wise, L. A. *et al.* Influence of body size and body fat distribution on risk of uterine  
529 leiomyomata in U.S. black women. *Epidemiology* **16**, 346-354 (2005).
- 530 46 Lee, J. E. *et al.* Weight change and risk of uterine leiomyomas: Korea Nurses' Health Study.  
531 *Curr. Med. Res. Opin.* **34**, 1913-1919, doi:10.1080/03007995.2018.1462783 (2018).
- 532 47 Bakas, P. *et al.* Estrogen receptor alpha and beta in uterine fibroids: a basis for altered  
533 estrogen responsiveness. *Fertil. Steril.* **90**, 1878-1885, doi:10.1016/j.fertnstert.2007.09.019  
534 (2008).
- 535 48 Valladares, F. *et al.* Characterization of estrogen receptors alpha and beta in uterine  
536 leiomyoma cells. *Fertil. Steril.* **86**, 1736-1743, doi:10.1016/j.fertnstert.2006.05.047 (2006).
- 537 49 Sipila, S. & Poutamo, J. Muscle performance, sex hormones and training in peri-menopausal  
538 and post-menopausal women. *Scand. J. Med. Sci. Sports* **13**, 19-25, doi:10.1034/j.1600-  
539 0838.2003.20210.x (2003).
- 540 50 Wood, C. L., Lane, L. C. & Cheetham, T. Puberty: Normal physiology (brief overview). *Best*  
541 *Pract. Res. Clin. Endocrinol. Metab.* **33**, 101265, doi:10.1016/j.beem.2019.03.001 (2019).
- 542 51 Barros, R. P. & Gustafsson, J. A. Estrogen receptors and the metabolic network. *Cell Metab*  
543 **14**, 289-299, doi:10.1016/j.cmet.2011.08.005 (2011).
- 544 52 Chidi-Ogbolu, N. & Baar, K. Effect of Estrogen on Musculoskeletal Performance and Injury  
545 Risk. *Front. Physiol.* **9**, 1834, doi:10.3389/fphys.2018.01834 (2018).



- 546 53 Velders, M. & Diel, P. How sex hormones promote skeletal muscle regeneration. *Sports Med.*  
547 **43**, 1089-1100, doi:10.1007/s40279-013-0081-6 (2013).
- 548 54 de Leeuw, C. A., Mooij, J. M., Heskes, T. & Posthuma, D. MAGMA: generalized gene-set  
549 analysis of GWAS data. *PLoS Comput. Biol.* **11**, e1004219,  
550 doi:10.1371/journal.pcbi.1004219 (2015).
- 551 55 Liberzon, A. *et al.* Molecular signatures database (MSigDB) 3.0. *Bioinformatics* **27**, 1739-  
552 1740, doi:10.1093/bioinformatics/btr260 (2011).
- 553 56 Consortium, G. T. The Genotype-Tissue Expression (GTEx) project. *Nat. Genet.* **45**, 580-585,  
554 doi:10.1038/ng.2653 (2013).
- 555 57 Watanabe, K., Taskesen, E., van Bochoven, A. & Posthuma, D. Functional mapping and  
556 annotation of genetic associations with FUMA. *Nat Commun* **8**, 1826, doi:10.1038/s41467-  
557 017-01261-5 (2017).
- 558 58 Hemani, G. *et al.* The MR-Base platform supports systematic causal inference across the  
559 human phenome. *Elife* **7**, doi:10.7554/eLife.34408 (2018).
- 560 59 Hemani, G., Tilling, K. & Davey Smith, G. Orienting the causal relationship between  
561 imprecisely measured traits using GWAS summary data. *PLoS genetics* **13**, e1007081,  
562 doi:10.1371/journal.pgen.1007081 (2017).
- 563 60 Sudlow, C. *et al.* UK biobank: an open access resource for identifying the causes of a wide  
564 range of complex diseases of middle and old age. *PLoS Med.* **12**, e1001779,  
565 doi:10.1371/journal.pmed.1001779 (2015).
- 566 61 Bycroft, C. *et al.* The UK Biobank resource with deep phenotyping and genomic data. *Nature*  
567 **562**, 203-209, doi:10.1038/s41586-018-0579-z (2018).
- 568 62 Zhou, W. *et al.* Efficiently controlling for case-control imbalance and sample relatedness in  
569 large-scale genetic association studies. *Nat. Genet.* **50**, 1335-1341, doi:10.1038/s41588-018-  
570 0184-y (2018).
- 571 63 Willer, C. J., Li, Y. & Abecasis, G. R. METAL: fast and efficient meta-analysis of  
572 genomewide association scans. *Bioinformatics* **26**, 2190-2191,  
573 doi:10.1093/bioinformatics/btq340 (2010).
- 574 64 Wang, K., Li, M. & Hakonarson, H. ANNOVAR: functional annotation of genetic variants  
575 from high-throughput sequencing data. *Nucleic Acids Res.* **38**, e164, doi:10.1093/nar/gkq603  
576 (2010).
- 577 65 UniProt, C. UniProt: a worldwide hub of protein knowledge. *Nucleic Acids Res.* **47**, D506-  
578 D515, doi:10.1093/nar/gky1049 (2019).
- 579 66 Zhu, Z. *et al.* Integration of summary data from GWAS and eQTL studies predicts complex  
580 trait gene targets. *Nat. Genet.* **48**, 481-487, doi:10.1038/ng.3538 (2016).
- 581 67 Cuéllar-Partida, G. *et al.* Complex-Traits Genetics Virtual Lab: A community-driven web  
582 platform for post-GWAS analyses. *bioRxiv*, 518027, doi:10.1101/518027 (2019).
- 583 68 Bulik-Sullivan, B. K. *et al.* LD Score regression distinguishes confounding from polygenicity  
584 in genome-wide association studies. *Nat. Genet.* **47**, 291-295, doi:10.1038/ng.3211 (2015).  
585  
586

## 587 **Contributors of FinnGen**

### 588 **Steering Committee**

589 Aarno Palotie Institute for Molecular Medicine Finland, HiLIFE, University of Helsinki, Finland  
590 Mark Daly Institute for Molecular Medicine Finland, HiLIFE, University of Helsinki, Finland

591

### 592 **Pharmaceutical companies**

593 Bridget Riley-Gills Abbvie, Chicago, IL, United States  
594 Howard Jacob Abbvie, Chicago, IL, United States  
595 Dirk Paul Astra Zeneca, Cambridge, United Kingdom  
596 Heiko Runz Biogen, Cambridge, MA, United States  
597 Sally John Biogen, Cambridge, MA, United States  
598 Robert Plenge Celgene, Summit, NJ, United States/Bristol Myers Squibb, New York, NY, United States  
599 Joseph Maranville Celgene, Summit, NJ, United States/Bristol Myers Squibb, New York, NY, United States  
600 Mark McCarthy Genentech, San Francisco, CA, United States  
601 Julie Hunkapiller Genentech, San Francisco, CA, United States  
602 Meg Ehm GlaxoSmithKline, Brentford, United Kingdom  
603 Kirsi Auro GlaxoSmithKline, Brentford, United Kingdom  
604 Simonne Longereich Merck, Kenilworth, NJ, United States  
605 Caroline Fox Merck, Kenilworth, NJ, United States  
606 Anders Mälarstig Pfizer, New York, NY, United States  
607 Katherine Klingler Sanofi, Paris, France  
608 Deepak Raipal Sanofi, Paris, France  
609 Eric Green Maze Therapeutics, San Francisco, CA, United States  
610 Robert Graham Maze Therapeutics, San Francisco, CA, United States  
611 Robert Yang Janssen Biotech, Beerse, Belgium  
612 Chris O'Donnell Novartis, Basel, Switzerland

613

### 614 **University of Helsinki & Biobanks**

615 Tomi Mäkelä HiLIFE, University of Helsinki, Finland, Finland  
616 Jaakko Kaprio Institute for Molecular Medicine Finland, HiLIFE, Helsinki, Finland, Finland  
617 Petri Virolainen Auria Biobank / University of Turku / Hospital District of Southwest Finland, Turku, Finland  
618 Antti Hakanen Auria Biobank / University of Turku / Hospital District of Southwest Finland, Turku, Finland  
619 Terhi Kilpi THL Biobank / The National Institute of Health and Welfare Helsinki, Finland  
620 Markus Perola THL Biobank / The National Institute of Health and Welfare Helsinki, Finland  
621 Jukka Partanen Finnish Red Cross Blood Service / Finnish Hematology Registry and Clinical Biobank,  
622 Helsinki, Finland  
623 Anne Pitkäranta Helsinki Biobank / Helsinki University and Hospital District of Helsinki and Uusimaa,  
624 Helsinki  
625 Juhani Junttila Northern Finland Biobank Borealis / University of Oulu / Northern Ostrobothnia Hospital  
626 District, Oulu, Finland  
627 Raisa Serpi Northern Finland Biobank Borealis / University of Oulu / Northern Ostrobothnia Hospital  
628 District, Oulu, Finland  
629 Tarja Laitinen Finnish Clinical Biobank Tampere / University of Tampere / Pirkanmaa Hospital District,  
630 Tampere, Finland  
631 Veli-Matti Kosma Biobank of Eastern Finland / University of Eastern Finland / Northern Savo Hospital District,  
632 Kuopio, Finland  
633 Urho Kujala Central Finland Biobank / University of Jyväskylä / Central Finland Health Care District,  
634 Jyväskylä, Finland  
635 Marco Hautalahti FINBB - Finnish biobank cooperative

636

### 637 **Other Experts/ Non-Voting Members**

638 Outi Tuovila Business Finland, Helsinki, Finland  
639 Raimo Pakkanen Business Finland, Helsinki, Finland

640

### 641 **Scientific Committee**

#### 642 **Pharmaceutical companies**

643 Jeffrey Waring Abbvie, Chicago, IL, United States  
644 Bridget Riley-Gillis Abbvie, Chicago, IL, United States  
645 Ioanna Tachmazidou Astra Zeneca, Cambridge, United Kingdom  
646 Chia-Yen Chen Biogen, Cambridge, MA, United States  
647 Heiko Runz Biogen, Cambridge, MA, United States  
648 Shameek Biswas Celgene, Summit, NJ, United States/Bristol Myers Squibb, New York, NY, United States  
649 Sarah Pendergrass Genentech, San Francisco, CA, United States  
650 Julie Hunkapiller Genentech, San Francisco, CA, United States  
651 Meg Ehm GlaxoSmithKline, Brentford, United Kingdom  
652 David Pulford GlaxoSmithKline, Brentford, United Kingdom  
653 Neha Raghavan Merck, Kenilworth, NJ, United States

|     |                                              |                                                                                               |
|-----|----------------------------------------------|-----------------------------------------------------------------------------------------------|
| 654 | Adriana Huertas-Vazquez                      | Merck, Kenilworth, NJ, United States                                                          |
| 655 | Jae-Hoon Sul                                 | Merck, Kenilworth, NJ, United States                                                          |
| 656 | Anders Mälärstig                             | Pfizer, New York, NY, United States                                                           |
| 657 | Xinli Hu                                     | Pfizer, New York, NY, United States                                                           |
| 658 | Katherine Klinger                            | Sanofi, Paris, France                                                                         |
| 659 | Matthias Gossel                              | Sanofi, Paris, France                                                                         |
| 660 | Robert Graham                                | Maze Therapeutics, San Francisco, CA, United States                                           |
| 661 | Eric Green                                   | Maze Therapeutics, San Francisco, CA, United States                                           |
| 662 | Sahar Mozaffari                              | Maze Therapeutics, San Francisco, CA, United States                                           |
| 663 | Dawn Waterworth                              | Janssen Research & Development, LLC, Spring House, PA, United States                          |
| 664 | Nicole Renaud                                | Novartis, Basel, Switzerland                                                                  |
| 665 | Ma'en Obeidat                                | Novartis, Basel, Switzerland                                                                  |
| 666 |                                              |                                                                                               |
| 667 | <b>University of Helsinki &amp; Biobanks</b> |                                                                                               |
| 668 | Samuli Ripatti                               | Institute for Molecular Medicine Finland, HiLIFE, Helsinki, Finland                           |
| 669 | Johanna Schleutker                           | Auria Biobank / Univ. of Turku / Hospital District of Southwest Finland, Turku, Finland       |
| 670 | Markus Perola                                | THL Biobank / The National Institute of Health and Welfare Helsinki, Finland                  |
| 671 | Mikko Arvas                                  | Finnish Red Cross Blood Service / Finnish Hematology Registry and Clinical Biobank,           |
| 672 | Helsinki, Finland                            |                                                                                               |
| 673 | Olli Carpén                                  | Helsinki Biobank / Helsinki University and Hospital District of Helsinki and Uusimaa,         |
| 674 | Helsinki                                     |                                                                                               |
| 675 | Reetta Hinttala                              | Northern Finland Biobank Borealis / University of Oulu / Northern Ostrobothnia Hospital       |
| 676 | District, Oulu, Finland                      |                                                                                               |
| 677 | Johannes Kettunen                            | Northern Finland Biobank Borealis / University of Oulu / Northern Ostrobothnia Hospital       |
| 678 | District, Oulu, Finland                      |                                                                                               |
| 679 | Arto Mannermaa                               | Biobank of Eastern Finland / University of Eastern Finland / Northern Savo Hospital District, |
| 680 | Kuopio, Finland                              |                                                                                               |
| 681 | Katriina Aalto-Setälä                        | Finnish Clinical Biobank Tampere / University of Tampere / Pirkanmaa Hospital District,       |
| 682 | Tampere, Finland                             |                                                                                               |
| 683 | Jari Laukkanen                               | Central Finland Biobank / University of Jyväskylä / Central Finland Health Care District,     |
| 684 | Jyväskylä, Finland                           |                                                                                               |
| 685 | Urho Kujala                                  | Central Finland Biobank / University of Jyväskylä / Central Finland Health Care District,     |
| 686 | Jyväskylä, Finland                           |                                                                                               |
| 687 | Johanna Mäkelä                               | FINBB - Finnish biobank cooperative                                                           |
| 688 |                                              |                                                                                               |
| 689 | <b>Clinical Groups</b>                       |                                                                                               |
| 690 | <b>Neurology Group</b>                       |                                                                                               |
| 691 | Reetta Kälviäinen                            | Northern Savo Hospital District, Kuopio, Finland                                              |
| 692 | Valteri Julkunen                             | Northern Savo Hospital District, Kuopio, Finland                                              |
| 693 | Hilkka Soinen                                | Northern Savo Hospital District, Kuopio, Finland                                              |
| 694 | Anne Remes                                   | Northern Ostrobothnia Hospital District, Oulu, Finland                                        |
| 695 | Mikko Hiltunen                               | Northern Savo Hospital District, Kuopio, Finland                                              |
| 696 | Jukka Peltola                                | Pirkanmaa Hospital District, Tampere, Finland                                                 |
| 697 | Minna Raivio                                 | Hospital District of Helsinki and Uusimaa, Helsinki, Finland                                  |
| 698 | Pentti Tienari                               | Hospital District of Helsinki and Uusimaa, Helsinki, Finland                                  |
| 699 | Juha Rinne                                   | Hospital District of Southwest Finland, Turku, Finland                                        |
| 700 | Roosa Kallionpää                             | Hospital District of Southwest Finland, Turku, Finland                                        |
| 701 | Juulia Partanen                              | Institute for Molecular Medicine Finland, HiLIFE, University of Helsinki, Finland             |
| 702 | Ali Abbasi                                   | Abbvie, Chicago, IL, United States                                                            |
| 703 | Adam Ziemann                                 | Abbvie, Chicago, IL, United States                                                            |
| 704 | Jeffrey Waring                               | Abbvie, Chicago, IL, United States                                                            |
| 705 | Sahar Esmaeeli                               | Abbvie, Chicago, IL, United States                                                            |
| 706 | Nizar Smaoui                                 | Abbvie, Chicago, IL, United States                                                            |
| 707 | Anne Lehtonen                                | Abbvie, Chicago, IL, United States                                                            |
| 708 | Susan Eaton                                  | Biogen, Cambridge, MA, United States                                                          |
| 709 | Heiko Runz                                   | Biogen, Cambridge, MA, United States                                                          |
| 710 | Sanni Lahdenperä                             | Biogen, Cambridge, MA, United States                                                          |
| 711 | Janet van Adelsberg                          | Celgene, Summit, NJ, United States/ Bristol Myers Squibb, New York, NY, United States         |
| 712 | Shameek Biswas                               | Celgene, Summit, NJ, United States/ Bristol Myers Squibb, New York, NY, United States         |
| 713 | Julie Hunkapiller                            | Genentech, San Francisco, CA, United States                                                   |
| 714 | Natalie Bowers                               | Genentech, San Francisco, CA, United States                                                   |
| 715 | Edmond Teng                                  | Genentech, San Francisco, CA, United States                                                   |
| 716 | Sarah Pendergrass                            | Genentech, San Francisco, CA, United States                                                   |
| 717 | Fanli Xu                                     | GlaxoSmithKline, Brentford, United Kingdom                                                    |
| 718 | David Pulford                                | GlaxoSmithKline, Brentford, United Kingdom                                                    |
| 719 | Kirsi Auro                                   | GlaxoSmithKline, Brentford, United Kingdom                                                    |
| 720 | Laura Addis                                  | GlaxoSmithKline, Brentford, United Kingdom                                                    |

|     |                               |                                                                                       |
|-----|-------------------------------|---------------------------------------------------------------------------------------|
| 721 | John Eicher                   | GlaxoSmithKline, Brentford, United Kingdom                                            |
| 722 | Qingqin S Li                  | Janssen Research & Development, LLC, Titusville, NJ 08560, United States              |
| 723 | Karen He                      | Janssen Research & Development, LLC, Spring House, PA, United States                  |
| 724 | Ekaterina Khrantsova          | Janssen Research & Development, LLC, Spring House, PA, United States                  |
| 725 | Beryl Cummings                | Maze Therapeutics, San Francisco, CA, United States                                   |
| 726 | Neha Raghavan                 | Merck, Kenilworth, NJ, United States                                                  |
| 727 | Kari Linden                   | Pfizer, New York, NY, United States                                                   |
| 728 |                               |                                                                                       |
| 729 | <b>Gastroenterology Group</b> |                                                                                       |
| 730 | Martti Färkkilä               | Hospital District of Helsinki and Uusimaa, Helsinki, Finland                          |
| 731 | Jukka Koskela                 | Hospital District of Helsinki and Uusimaa, Helsinki, Finland                          |
| 732 | Sampsa Pikkarainen            | Hospital District of Helsinki and Uusimaa, Helsinki, Finland                          |
| 733 | Airi Jussila                  | Pirkanmaa Hospital District, Tampere, Finland                                         |
| 734 | Katri Kaukinen                | Pirkanmaa Hospital District, Tampere, Finland                                         |
| 735 | Timo Blomster                 | Northern Ostrobothnia Hospital District, Oulu, Finland                                |
| 736 | Mikko Kiviniemi               | Northern Savo Hospital District, Kuopio, Finland                                      |
| 737 | Markku Voutilainen            | Hospital District of Southwest Finland, Turku, Finland                                |
| 738 | Mark Daly                     | Institute for Molecular Medicine Finland, HiLIFE, University of Helsinki, Finland     |
| 739 | Ali Abbasi                    | Abbvie, Chicago, IL, United States                                                    |
| 740 | Graham Heap                   | Abbvie, Chicago, IL, United States                                                    |
| 741 | Jeffrey Waring                | Abbvie, Chicago, IL, United States                                                    |
| 742 | Nizar Smaoui                  | Abbvie, Chicago, IL, United States                                                    |
| 743 | Fedik Rahimov                 | Abbvie, Chicago, IL, United States                                                    |
| 744 | Anne Lehtonen                 | Abbvie, Chicago, IL, United States                                                    |
| 745 | Keith Usiskin                 | Celgene, Summit, NJ, United States/ Bristol Myers Squibb, New York, NY, United States |
| 746 | Tim Lu                        | Genentech, San Francisco, CA, United States                                           |
| 747 | Natalie Bowers                | Genentech, San Francisco, CA, United States                                           |
| 748 | Danny Oh                      | Genentech, San Francisco, CA, United States                                           |
| 749 | Sarah Pendergrass             | Genentech, San Francisco, CA, United States                                           |
| 750 | Linda McCarthy                | GlaxoSmithKline, Brentford, United Kingdom                                            |
| 751 | Amy Hart                      | Janssen Research & Development, LLC, Spring House, PA, United States                  |
| 752 | Meijian Guan                  | Janssen Research & Development, LLC, Spring House, PA, United States                  |
| 753 | Jason Miller                  | Merck, Kenilworth, NJ, United States                                                  |
| 754 | Kirsi Kalpala                 | Pfizer, New York, NY, United States                                                   |
| 755 | Melissa Miller                | Pfizer, New York, NY, United States                                                   |
| 756 | Xinli Hu                      | Pfizer, New York, NY, United States                                                   |
| 757 |                               |                                                                                       |
| 758 | <b>Rheumatology Group</b>     |                                                                                       |
| 759 | Kari Eklund                   | Hospital District of Helsinki and Uusimaa, Helsinki, Finland                          |
| 760 | Antti Palomäki                | Hospital District of Southwest Finland, Turku, Finland                                |
| 761 | Pia Isomäki                   | Pirkanmaa Hospital District, Tampere, Finland                                         |
| 762 | Laura Pirilä                  | Hospital District of Southwest Finland, Turku, Finland                                |
| 763 | Oili Kaipainen-Seppänen       | Northern Savo Hospital District, Kuopio, Finland                                      |
| 764 | Johanna Huhtakangas           | Northern Ostrobothnia Hospital District, Oulu, Finland                                |
| 765 | Nina Mars                     | Institute for Molecular Medicine Finland, HiLIFE, Helsinki, Finland                   |
| 766 | Ali Abbasi                    | Abbvie, Chicago, IL, United States                                                    |
| 767 | Jeffrey Waring                | Abbvie, Chicago, IL, United States                                                    |
| 768 | Fedik Rahimov                 | Abbvie, Chicago, IL, United States                                                    |
| 769 | Apinya Lertratanakul          | Abbvie, Chicago, IL, United States                                                    |
| 770 | Nizar Smaoui                  | Abbvie, Chicago, IL, United States                                                    |
| 771 | Anne Lehtonen                 | Abbvie, Chicago, IL, United States                                                    |
| 772 | David Close                   | Astra Zeneca, Cambridge, United Kingdom                                               |
| 773 | Marla Hochfeld                | Celgene, Summit, NJ, United States/ Bristol Myers Squibb, New York, NY, United States |
| 774 | Natalie Bowers                | Genentech, San Francisco, CA, United States                                           |
| 775 | Sarah Pendergrass             | Genentech, San Francisco, CA, United States                                           |
| 776 | Jorge Esparza Gordillo        | GlaxoSmithKline, Brentford, United Kingdom                                            |
| 777 | Kirsi Auro                    | GlaxoSmithKline, Brentford, United Kingdom                                            |
| 778 | Dawn Waterworth               | Janssen Research & Development, LLC, Spring House, PA, United States                  |
| 779 | Fabiana Farias                | Merck, Kenilworth, NJ, United States                                                  |
| 780 | Kirsi Kalpala                 | Pfizer, New York, NY, United States                                                   |
| 781 | Nan Bing                      | Pfizer, New York, NY, United States                                                   |
| 782 | Xinli Hu                      | Pfizer, New York, NY, United States                                                   |
| 783 |                               |                                                                                       |
| 784 | <b>Pulmonology Group</b>      |                                                                                       |
| 785 | Tarja Laitinen                | Pirkanmaa Hospital District, Tampere, Finland                                         |
| 786 | Margit Pelkonen               | Northern Savo Hospital District, Kuopio, Finland                                      |
| 787 | Paula Kauppi                  | Hospital District of Helsinki and Uusimaa, Helsinki, Finland                          |

|     |                                         |                                                                                           |
|-----|-----------------------------------------|-------------------------------------------------------------------------------------------|
| 788 | Hannu Kankaanranta                      | Pirkanmaa Hospital District, Tampere, Finland                                             |
| 789 | Terttu Harju                            | Northern Ostrobothnia Hospital District, Oulu, Finland                                    |
| 790 | Riitta Lahesmaa                         | Hospital District of Southwest Finland, Turku, Finland                                    |
| 791 | Nizar Smaoui                            | Abbvie, Chicago, IL, United States                                                        |
| 792 | Alex Mackay                             | Astra Zeneca, Cambridge, United Kingdom                                                   |
| 793 | Glenda Lassi                            | Astra Zeneca, Cambridge, United Kingdom                                                   |
| 794 | Susan Eaton                             | Biogen, Cambridge, MA, United States                                                      |
| 795 | Steven Greenberg                        | Celgene, Summit, NJ, United States/ Bristol Myers Squibb, New York, NY, United States     |
| 796 | Hubert Chen                             | Genentech, San Francisco, CA, United States                                               |
| 797 | Sarah Pendergrass                       | Genentech, San Francisco, CA, United States                                               |
| 798 | Natalie Bowers                          | Genentech, San Francisco, CA, United States                                               |
| 799 | Joanna Betts                            | GlaxoSmithKline, Brentford, United Kingdom                                                |
| 800 | Soumitra Ghosh                          | GlaxoSmithKline, Brentford, United Kingdom                                                |
| 801 | Kirsi Auro                              | GlaxoSmithKline, Brentford, United Kingdom                                                |
| 802 | Rajashree Mishra                        | GlaxoSmithKline, Brentford, United Kingdom                                                |
| 803 |                                         |                                                                                           |
| 804 | <b>Cardiometabolic Diseases Group</b>   |                                                                                           |
| 805 | Teemu Niiranen                          | The National Institute of Health and Welfare Helsinki, Finland                            |
| 806 | Felix Vaura                             | The National Institute of Health and Welfare Helsinki, Finland                            |
| 807 | Veikko Salomaa                          | The National Institute of Health and Welfare Helsinki, Finland                            |
| 808 | Markus Juonala                          | Hospital District of Southwest Finland, Turku, Finland                                    |
| 809 | Kaj Metsärinne                          | Hospital District of Southwest Finland, Turku, Finland                                    |
| 810 | Mika Kähönen                            | Pirkanmaa Hospital District, Tampere, Finland                                             |
| 811 | Juhani Junttila                         | Northern Ostrobothnia Hospital District, Oulu, Finland                                    |
| 812 | Markku Laakso                           | Northern Savo Hospital District, Kuopio, Finland                                          |
| 813 | Jussi Pihlajamäki                       | Northern Savo Hospital District, Kuopio, Finland                                          |
| 814 | Daniel Gordin                           | Hospital District of Helsinki and Uusimaa, Helsinki, Finland                              |
| 815 | Juha Sinisalo                           | Hospital District of Helsinki and Uusimaa, Helsinki, Finland                              |
| 816 | Marja-Riitta Taskinen                   | Hospital District of Helsinki and Uusimaa, Helsinki, Finland                              |
| 817 | Tiinamaija Tuomi                        | Hospital District of Helsinki and Uusimaa, Helsinki, Finland                              |
| 818 | Jari Laukkanen                          | Central Finland Health Care District, Jyväskylä, Finland                                  |
| 819 | Amanda Elliott                          | Institute for Molecular Medicine Finland, HiLIFE, University of Helsinki, Finland / Broad |
| 820 | Institute, Cambridge, MA, United States |                                                                                           |
| 821 | Joel Rämö                               | Institute for Molecular Medicine Finland, HiLIFE, University of Helsinki, Finland         |
| 822 | Samuli Ripatti                          | Institute for Molecular Medicine Finland, HiLIFE, University of Helsinki, Finland         |
| 823 | Mary Pat Reeve                          | Institute for Molecular Medicine Finland, HiLIFE, University of Helsinki, Finland         |
| 824 | Sanni Ruotsalainen                      | Institute for Molecular Medicine Finland, HiLIFE, University of Helsinki, Finland         |
| 825 | Benjamin Challis                        | Astra Zeneca, Cambridge, United Kingdom                                                   |
| 826 | Dirk Paul                               | Astra Zeneca, Cambridge, United Kingdom                                                   |
| 827 | Keith Usiskin                           | Celgene, Summit, NJ, United States/ Bristol Myers Squibb, New York, NY, United States     |
| 828 | Julie Hunkapiller                       | Genentech, San Francisco, CA, United States                                               |
| 829 | Natalie Bowers                          | Genentech, San Francisco, CA, United States                                               |
| 830 | Sarah Pendergrass                       | Genentech, San Francisco, CA, United States                                               |
| 831 | Audrey Chu                              | GlaxoSmithKline, Brentford, United Kingdom                                                |
| 832 | Kirsi Auro                              | GlaxoSmithKline, Brentford, United Kingdom                                                |
| 833 | Dermot Reilly                           | Janssen Research & Development, LLC, Boston, MA, United States                            |
| 834 | Jaakko Parkkinen                        | Pfizer, New York, NY, United States                                                       |
| 835 | Melissa Miller                          | Pfizer, New York, NY, United States                                                       |
| 836 | Russell Miller                          | Pfizer, New York, NY, United States                                                       |
| 837 |                                         |                                                                                           |
| 838 | <b>Oncology Group</b>                   |                                                                                           |
| 839 | Tuomo Meretoja                          | Hospital District of Helsinki and Uusimaa, Helsinki, Finland                              |
| 840 | Heikki Joensuu                          | Hospital District of Helsinki and Uusimaa, Helsinki, Finland                              |
| 841 | Olli Carpén                             | Hospital District of Helsinki and Uusimaa, Helsinki, Finland                              |
| 842 | Lauri Aaltonen                          | Hospital District of Helsinki and Uusimaa, Helsinki, Finland                              |
| 843 | Johanna Mattson                         | Hospital District of Helsinki and Uusimaa, Helsinki, Finland                              |
| 844 | Annika Auranen                          | Pirkanmaa Hospital District, Tampere, Finland                                             |
| 845 | Peeter Karhitala                        | Northern Ostrobothnia Hospital District, Oulu, Finland                                    |
| 846 | Saila Kauppila                          | Northern Ostrobothnia Hospital District, Oulu, Finland                                    |
| 847 | Päivi Auvinen                           | Northern Savo Hospital District, Kuopio, Finland                                          |
| 848 | Klaus Elenius                           | Hospital District of Southwest Finland, Turku, Finland                                    |
| 849 | Johanna Schleutker                      | Hospital District of Southwest Finland, Turku, Finland                                    |
| 850 | Esa Pitkänen                            | Institute for Molecular Medicine Finland, HiLIFE, University of Helsinki, Finland         |
| 851 | Nina Mars                               | Institute for Molecular Medicine Finland, HiLIFE, University of Helsinki, Finland         |
| 852 | Mark Daly                               | Institute for Molecular Medicine Finland, HiLIFE, University of Helsinki, Finland         |
| 853 | Relja Popovic                           | Abbvie, Chicago, IL, United States                                                        |
| 854 | Jeffrey Waring                          | Abbvie, Chicago, IL, United States                                                        |

|     |                            |                                                                                   |
|-----|----------------------------|-----------------------------------------------------------------------------------|
| 855 | Bridget Riley-Gillis       | Abbvie, Chicago, IL, United States                                                |
| 856 | Anne Lehtonen              | Abbvie, Chicago, IL, United States                                                |
| 857 | Jennifer Schutzman         | Genentech, San Francisco, CA, United States                                       |
| 858 | Julie Hunkapiller          | Genentech, San Francisco, CA, United States                                       |
| 859 | Natalie Bowers             | Genentech, San Francisco, CA, United States                                       |
| 860 | Sarah Pendergrass          | Genentech, San Francisco, CA, United States                                       |
| 861 | Diptee Kulkarni            | GlaxoSmithKline, Brentford, United Kingdom                                        |
| 862 | Kirsi Auro                 | GlaxoSmithKline, Brentford, United Kingdom                                        |
| 863 | Alessandro Porello         | Janssen Research & Development, LLC, Spring House, PA, United States              |
| 864 | Andrey Loboda              | Merck, Kenilworth, NJ, United States                                              |
| 865 | Heli Lehtonen              | Pfizer, New York, NY, United States                                               |
| 866 | Stefan McDonough           | Pfizer, New York, NY, United States                                               |
| 867 | Marika Crohns              | Sanofi, Paris, France                                                             |
| 868 | Sauli Vuoti                | Sanofi, Paris, France                                                             |
| 869 |                            |                                                                                   |
| 870 | <b>Ophthalmology Group</b> |                                                                                   |
| 871 | Kai Kaarniranta            | Northern Savo Hospital District, Kuopio, Finland                                  |
| 872 | Joni A Turunen             | Hospital District of Helsinki and Uusimaa, Helsinki, Finland                      |
| 873 | Terhi Ollila               | Hospital District of Helsinki and Uusimaa, Helsinki, Finland                      |
| 874 | Sanna Seitsonen            | Hospital District of Helsinki and Uusimaa, Helsinki, Finland                      |
| 875 | Hannu Uusitalo             | Pirkanmaa Hospital District, Tampere, Finland                                     |
| 876 | Vesa Aaltonen              | Hospital District of Southwest Finland, Turku, Finland                            |
| 877 | Hannele Uusitalo-Järvinen  | Pirkanmaa Hospital District, Tampere, Finland                                     |
| 878 | Marja Luodonpää            | Northern Ostrobothnia Hospital District, Oulu, Finland                            |
| 879 | Nina Hautala               | Northern Ostrobothnia Hospital District, Oulu, Finland                            |
| 880 | Juha Karjalainen           | Institute for Molecular Medicine Finland, HiLIFE, University of Helsinki, Finland |
| 881 | Esa Pitkänen               | Institute for Molecular Medicine Finland, HiLIFE, University of Helsinki, Finland |
| 882 | Mengzhen Liu               | Abbvie, Chicago, IL, United States                                                |
| 883 | Heiko Runz                 | Biogen, Cambridge, MA, United States                                              |
| 884 | Stephanie Loomis           | Biogen, Cambridge, MA, United States                                              |
| 885 | Erich Strauss              | Genentech, San Francisco, CA, United States                                       |
| 886 | Natalie Bowers             | Genentech, San Francisco, CA, United States                                       |
| 887 | Hao Chen                   | Genentech, San Francisco, CA, United States                                       |
| 888 | Sarah Pendergrass          | Genentech, San Francisco, CA, United States                                       |
| 889 |                            |                                                                                   |
| 890 | <b>Dermatology Group</b>   |                                                                                   |
| 891 | Kaisa Tasanen              | Northern Ostrobothnia Hospital District, Oulu, Finland                            |
| 892 | Laura Huilaja              | Northern Ostrobothnia Hospital District, Oulu, Finland                            |
| 893 | Katariina Hannula-Jouppi   | Hospital District of Helsinki and Uusimaa, Helsinki, Finland                      |
| 894 | Teea Salmi                 | Pirkanmaa Hospital District, Tampere, Finland                                     |
| 895 | Sirkku Peltonen            | Hospital District of Southwest Finland, Turku, Finland                            |
| 896 | Leena Koulu                | Hospital District of Southwest Finland, Turku, Finland                            |
| 897 | Nizar Smaoui               | Abbvie, Chicago, IL, United States                                                |
| 898 | Fedik Rahimov              | Abbvie, Chicago, IL, United States                                                |
| 899 | Anne Lehtonen              | Abbvie, Chicago, IL, United States                                                |
| 900 | David Choy                 | Genentech, San Francisco, CA, United States                                       |
| 901 | Sarah Pendergrass          | Genentech, San Francisco, CA, United States                                       |
| 902 | Dawn Waterworth            | Janssen Research & Development, LLC, Spring House, PA, United States              |
| 903 | Kirsi Kalpala              | Pfizer, New York, NY, United States                                               |
| 904 | Ying Wu                    | Pfizer, New York, NY, United States                                               |
| 905 |                            |                                                                                   |
| 906 | <b>Odontology Group</b>    |                                                                                   |
| 907 | Pirkko Pussinen            | Hospital District of Helsinki and Uusimaa, Helsinki, Finland                      |
| 908 | Aino Salminen              | Hospital District of Helsinki and Uusimaa, Helsinki, Finland                      |
| 909 | Tuula Salo                 | Hospital District of Helsinki and Uusimaa, Helsinki, Finland                      |
| 910 | David Rice                 | Hospital District of Helsinki and Uusimaa, Helsinki, Finland                      |
| 911 | Pekka Nieminen             | Hospital District of Helsinki and Uusimaa, Helsinki, Finland                      |
| 912 | Ulla Palotie               | Hospital District of Helsinki and Uusimaa, Helsinki, Finland                      |
| 913 | Juha Sinisalo              | Hospital District of Helsinki and Uusimaa, Helsinki, Finland                      |
| 914 | Maria Sipilä               | Northern Savo Hospital District, Kuopio, Finland                                  |
| 915 | Liisa Suominen             | Northern Savo Hospital District, Kuopio, Finland                                  |
| 916 | Päivi Mäntylä              | Northern Savo Hospital District, Kuopio, Finland                                  |
| 917 | Ulvi Gursoy                | Hospital District of Southwest Finland, Turku, Finland                            |
| 918 | Vuokko Anttonen            | Northern Ostrobothnia Hospital District, Oulu, Finland                            |
| 919 | Kirsi Sipilä               | Northern Ostrobothnia Hospital District, Oulu, Finland                            |
| 920 | Sarah Pendergrass          | Genentech, San Francisco, CA, United States                                       |
| 921 |                            |                                                                                   |

922 **Women's Health and Reproduction Group**

|     |                         |                                                                                   |
|-----|-------------------------|-----------------------------------------------------------------------------------|
| 923 | Hannele Laivuori        | Institute for Molecular Medicine Finland, HiLIFE, University of Helsinki, Finland |
| 924 | Venla Kurra             | Pirkanmaa Hospital District, Tampere, Finland                                     |
| 925 | Oskari Heikinheimo      | Hospital District of Helsinki and Uusimaa, Helsinki, Finland                      |
| 926 | Ilkka Kalliala          | Hospital District of Helsinki and Uusimaa, Helsinki, Finland                      |
| 927 | Laura Kotaniemi-Talonen | Pirkanmaa Hospital District, Tampere, Finland                                     |
| 928 | Kari Nieminen           | Pirkanmaa Hospital District, Tampere, Finland                                     |
| 929 | Päivi Polo              | Hospital District of Southwest Finland, Turku, Finland                            |
| 930 | Kaarin Mäkikallio       | Hospital District of Southwest Finland, Turku, Finland                            |
| 931 | Eeva Ekholm             | Hospital District of Southwest Finland, Turku, Finland                            |
| 932 | Marja Väärämäki         | Northern Ostrobothnia Hospital District, Oulu, Finland                            |
| 933 | Outi Uimari             | Northern Ostrobothnia Hospital District, Oulu, Finland                            |
| 934 | Laure Morin-Papunen     | Northern Ostrobothnia Hospital District, Oulu, Finland                            |
| 935 | Marjo Tuppurainen       | Northern Savo Hospital District, Kuopio, Finland                                  |
| 936 | Katja Kivinen           | Institute for Molecular Medicine Finland, HiLIFE, University of Helsinki, Finland |
| 937 | Elisabeth Widen         | Institute for Molecular Medicine Finland, HiLIFE, University of Helsinki, Finland |
| 938 | Taru Tukiainen          | Institute for Molecular Medicine Finland, HiLIFE, University of Helsinki, Finland |
| 939 | Mary Pat Reeve          | Institute for Molecular Medicine Finland, HiLIFE, University of Helsinki, Finland |
| 940 | Mark Daly               | Institute for Molecular Medicine Finland, HiLIFE, University of Helsinki, Finland |
| 941 | Liu Aoxing              | Institute for Molecular Medicine Finland, HiLIFE, University of Helsinki, Finland |
| 942 | Andrea Ganna            | Institute for Molecular Medicine Finland, HiLIFE, University of Helsinki, Finland |
| 943 | Eija Laakkonen          | University of Jyväskylä, Jyväskylä, Finland                                       |
| 944 | Niko Välimäki           | University of Helsinki, Helsinki, Finland                                         |
| 945 | Lauri Aaltonen          | Hospital District of Helsinki and Uusimaa, Helsinki, Finland                      |
| 946 | Johannes Kettunen       | Northern Ostrobothnia Hospital District, Oulu, Finland                            |
| 947 | Mikko Arvas             | Finnish Red Cross Blood Service, Helsinki, Finland                                |
| 948 | Jeffrey Waring          | Abbvie, Chicago, IL, United States                                                |
| 949 | Bridget Riley-Gillis    | Abbvie, Chicago, IL, United States                                                |
| 950 | Mengzhen Liu            | Abbvie, Chicago, IL, United States                                                |
| 951 | Sarah Pendergrass       | Genentech, San Francisco, CA, United States                                       |
| 952 | Janet Kumar             | GlaxoSmithKline, Brentford, United Kingdom                                        |
| 953 | Kirsi Auro              | GlaxoSmithKline, Brentford, United Kingdom                                        |

954

955 **FinnGen Analysis working group**

|     |                      |                                                                                       |
|-----|----------------------|---------------------------------------------------------------------------------------|
| 956 | Justin Wade Davis    | Abbvie, Chicago, IL, United States                                                    |
| 957 | Bridget Riley-Gillis | Abbvie, Chicago, IL, United States                                                    |
| 958 | Reza Hammond         | Abbvie, Chicago, IL, United States                                                    |
| 959 | Fedik Rahimov        | Abbvie, Chicago, IL, United States                                                    |
| 960 | Sabah Kadri          | Abbvie, Chicago, IL, United States                                                    |
| 961 | Sahar Esmaeeli       | Abbvie, Chicago, IL, United States                                                    |
| 962 | Mengzhen Liu         | Abbvie, Chicago, IL, United States                                                    |
| 963 | Slavé Petrovski      | Astra Zeneca, Cambridge, United Kingdom                                               |
| 964 | Eleonor Wigmore      | Astra Zeneca, Cambridge, United Kingdom                                               |
| 965 | Adele Mitchell       | Biogen, Cambridge, MA, United States                                                  |
| 966 | Benjamin Sun         | Biogen, Cambridge, MA, United States                                                  |
| 967 | Ellen Tsai           | Biogen, Cambridge, MA, United States                                                  |
| 968 | Denis Baird          | Biogen, Cambridge, MA, United States                                                  |
| 969 | Paola Bronson        | Biogen, Cambridge, MA, United States                                                  |
| 970 | Ruoyu Tian           | Biogen, Cambridge, MA, United States                                                  |
| 971 | Stephanie Loomis     | Biogen, Cambridge, MA, United States                                                  |
| 972 | Yunfeng Huang        | Biogen, Cambridge, MA, United States                                                  |
| 973 | Joseph Maranville    | Celgene, Summit, NJ, United States/ Bristol Myers Squibb, New York, NY, United States |
| 974 | Shameek Biswas       | Celgene, Summit, NJ, United States/ Bristol Myers Squibb, New York, NY, United States |
| 975 | Elmutaz Mohammed     | Celgene, Summit, NJ, United States/ Bristol Myers Squibb, New York, NY, United States |
| 976 | Samir Wadhawan       | Celgene, Summit, NJ, United States/ Bristol Myers Squibb, New York, NY, United States |
| 977 | Erika Kvikstad       | Celgene, Summit, NJ, United States/ Bristol Myers Squibb, New York, NY, United States |
| 978 | Minal Caliskan       | Celgene, Summit, NJ, United States/ Bristol Myers Squibb, New York, NY, United States |
| 979 | Diana Chang          | Genentech, San Francisco, CA, United States                                           |
| 980 | Julie Hunkapiller    | Genentech, San Francisco, CA, United States                                           |
| 981 | Tushar Bhangale      | Genentech, San Francisco, CA, United States                                           |
| 982 | Natalie Bowers       | Genentech, San Francisco, CA, United States                                           |
| 983 | Sarah Pendergrass    | Genentech, San Francisco, CA, United States                                           |
| 984 | Karen S King         | GlaxoSmithKline, Brentford, United Kingdom                                            |
| 985 | Padhraig Gormley     | GlaxoSmithKline, Brentford, United Kingdom                                            |
| 986 | Jimmy Liu            | GlaxoSmithKline, Brentford, United Kingdom                                            |
| 987 | Karsten Sieber       | Janssen Research & Development, LLC, Spring House, PA, United States                  |
| 988 | Amy Hart             | Janssen Research & Development, LLC, Spring House, PA, United States                  |

|      |                                         |                                                                                           |
|------|-----------------------------------------|-------------------------------------------------------------------------------------------|
| 989  | Meijian Guan                            | Janssen Research & Development, LLC, Spring House, PA, United States                      |
| 990  | Shicheng Guo                            | Janssen Research & Development, LLC, Spring House, PA, United States                      |
| 991  | Beryl Cummings                          | Maze Therapeutics, San Francisco, CA, United States                                       |
| 992  | Matt Brauer                             | Maze Therapeutics, San Francisco, CA, United States                                       |
| 993  | Jason Miller                            | Merck, Kenilworth, NJ, United States                                                      |
| 994  | Fabiana Farias                          | Merck, Kenilworth, NJ, United States                                                      |
| 995  | Jorge Del-Aguila                        | Merck, Kenilworth, NJ, United States                                                      |
| 996  | Kirill Shkura                           | Merck, Kenilworth, NJ, United States                                                      |
| 997  | Victor Neduva                           | Merck, Kenilworth, NJ, United States                                                      |
| 998  | Huilei Xu                               | Novartis, Basel, Switzerland                                                              |
| 999  | Amy Cole                                | Novartis, Basel, Switzerland                                                              |
| 1000 | Jonathan Chung                          | Novartis, Basel, Switzerland                                                              |
| 1001 | Jaison Jacob                            | Novartis, Basel, Switzerland                                                              |
| 1002 | Katrina de Lange                        | Novartis, Basel, Switzerland                                                              |
| 1003 | Jonas Zierer                            | Novartis, Basel, Switzerland                                                              |
| 1004 | Xing Chen                               | Pfizer, New York, NY, United States                                                       |
| 1005 | Åsa Hedman                              | Pfizer, New York, NY, United States                                                       |
| 1006 | Clarence Wang                           | Sanofi, Paris, France                                                                     |
| 1007 | Ethan Xu                                | Sanofi, Paris, France                                                                     |
| 1008 | Franck Auge                             | Sanofi, Paris, France                                                                     |
| 1009 | Clement Chatelain                       | Sanofi, Paris, France                                                                     |
| 1010 | Deepak Rajpal                           | Sanofi, Paris, France                                                                     |
| 1011 | Dongyu Liu                              | Sanofi, Paris, France                                                                     |
| 1012 | Katherine Call                          | Sanofi, Paris, France                                                                     |
| 1013 | Tai-He Xia                              | Sanofi, Paris, France                                                                     |
| 1014 | Mitja Kurki                             | Institute for Molecular Medicine Finland, HiLIFE, University of Helsinki, Finland / Broad |
| 1015 | Institute, Cambridge, MA, United States |                                                                                           |
| 1016 | Samuli Ripatti                          | Institute for Molecular Medicine Finland, HiLIFE, University of Helsinki, Finland         |
| 1017 | Mark Daly                               | Institute for Molecular Medicine Finland, HiLIFE, University of Helsinki, Finland         |
| 1018 | Juha Karjalainen                        | Institute for Molecular Medicine Finland, HiLIFE, University of Helsinki, Finland         |
| 1019 | Aki Havulinna                           | Institute for Molecular Medicine Finland, HiLIFE, University of Helsinki, Finland         |
| 1020 | Juha Mehtonen                           | Institute for Molecular Medicine Finland, HiLIFE, University of Helsinki, Finland         |
| 1021 | Priit Palta                             | Institute for Molecular Medicine Finland, HiLIFE, University of Helsinki, Finland         |
| 1022 | Shabbeer Hassan                         | Institute for Molecular Medicine Finland, HiLIFE, University of Helsinki, Finland         |
| 1023 | Pietro Della Briotta Parolo             | Institute for Molecular Medicine Finland, HiLIFE, University of Helsinki, Finland         |
| 1024 | Wei Zhou                                | Broad Institute, Cambridge, MA, United States                                             |
| 1025 | Mutaamba Maasha                         | Broad Institute, Cambridge, MA, United States                                             |
| 1026 | Shabbeer Hassan                         | Institute for Molecular Medicine Finland, HiLIFE, University of Helsinki, Finland         |
| 1027 | Susanna Lemmelä                         | Institute for Molecular Medicine Finland, HiLIFE, University of Helsinki, Finland         |
| 1028 | Manuel Rivas                            | University of Stanford, Stanford, CA, United States                                       |
| 1029 | Aarno Palotie                           | Institute for Molecular Medicine Finland, HiLIFE, University of Helsinki, Finland         |
| 1030 | Arto Lehisto                            | Institute for Molecular Medicine Finland, HiLIFE, University of Helsinki, Finland         |
| 1031 | Andrea Ganna                            | Institute for Molecular Medicine Finland, HiLIFE, University of Helsinki, Finland         |
| 1032 | Vincent Llorens                         | Institute for Molecular Medicine Finland, HiLIFE, University of Helsinki, Finland         |
| 1033 | Hannele Laiivuori                       | Institute for Molecular Medicine Finland, HiLIFE, University of Helsinki, Finland         |
| 1034 | Mari E Niemi                            | Institute for Molecular Medicine Finland, HiLIFE, University of Helsinki, Finland         |
| 1035 | Taru Tukiainen                          | Institute for Molecular Medicine Finland, HiLIFE, University of Helsinki, Finland         |
| 1036 | Mary Pat Reeve                          | Institute for Molecular Medicine Finland, HiLIFE, University of Helsinki, Finland         |
| 1037 | Henrike Heyne                           | Institute for Molecular Medicine Finland, HiLIFE, University of Helsinki, Finland         |
| 1038 | Nina Mars                               | Institute for Molecular Medicine Finland, HiLIFE, University of Helsinki, Finland         |
| 1039 | Kimmo Palin                             | University of Helsinki, Helsinki, Finland                                                 |
| 1040 | Javier Garcia-Tabuena                   | University of Tampere, Tampere, Finland                                                   |
| 1041 | Harri Siirtola                          | University of Tampere, Tampere, Finland                                                   |
| 1042 | Tuomo Kiiskinen                         | Institute for Molecular Medicine Finland, HiLIFE, University of Helsinki, Finland         |
| 1043 | Jiwoo Lee                               | Institute for Molecular Medicine Finland, HiLIFE, University of Helsinki, Finland / Broad |
| 1044 | Institute, Cambridge, MA, United States |                                                                                           |
| 1045 | Kristin Tsuo                            | Institute for Molecular Medicine Finland, HiLIFE, University of Helsinki, Finland / Broad |
| 1046 | Institute, Cambridge, MA, United States |                                                                                           |
| 1047 | Amanda Elliott                          | Institute for Molecular Medicine Finland, HiLIFE, University of Helsinki, Finland / Broad |
| 1048 | Institute, Cambridge, MA, United States |                                                                                           |
| 1049 | Kati Kristiansson                       | THL Biobank / The National Institute of Health and Welfare Helsinki, Finland              |
| 1050 | Mikko Arvas                             | Finnish Red Cross Blood Service / Finnish Hematology Registry and Clinical Biobank,       |
| 1051 | Helsinki, Finland                       |                                                                                           |
| 1052 | Kati Hyvärinen                          | Finnish Red Cross Blood Service, Helsinki, Finland                                        |
| 1053 | Jarmo Ritari                            | Finnish Red Cross Blood Service, Helsinki, Finland                                        |
| 1054 | Miika Koskinen                          | Helsinki Biobank / Helsinki University and Hospital District of Helsinki and Uusimaa,     |
| 1055 | Helsinki                                |                                                                                           |



|      |                                         |                                                                                               |
|------|-----------------------------------------|-----------------------------------------------------------------------------------------------|
| 1056 | Olli Carpén                             | Helsinki Biobank / Helsinki University and Hospital District of Helsinki and Uusimaa,         |
| 1057 | Helsinki                                |                                                                                               |
| 1058 | Johannes Kettunen                       | Northern Finland Biobank Borealis / University of Oulu / Northern Ostrobothnia Hospital       |
| 1059 | District, Oulu, Finland                 |                                                                                               |
| 1060 | Katri Pylkäs                            | University of Oulu, Oulu, Finland                                                             |
| 1061 | Eeva Sliz                               | University of Oulu, Oulu, Finland                                                             |
| 1062 | Minna Karjalainen                       | University of Oulu, Oulu, Finland                                                             |
| 1063 | Tuomo Mantere                           | Northern Finland Biobank Borealis / University of Oulu / Northern Ostrobothnia Hospital       |
| 1064 | District, Oulu, Finland                 |                                                                                               |
| 1065 | Eeva Kangasniemi                        | Finnish Clinical Biobank Tampere / University of Tampere / Pirkanmaa Hospital District,       |
| 1066 | Tampere, Finland                        |                                                                                               |
| 1067 | Sami Heikkinen                          | University of Eastern Finland, Kuopio, Finland                                                |
| 1068 | Arto Mannermaa                          | Biobank of Eastern Finland / University of Eastern Finland / Northern Savo Hospital District, |
| 1069 | Kuopio, Finland                         |                                                                                               |
| 1070 | Eija Laakkonen                          | University of Jyväskylä, Jyväskylä, Finland                                                   |
| 1071 | Dhanaprakash Jambulingam                | University of Turku, Turku, Finland                                                           |
| 1072 | Venkat Subramaniam Rathinakannan        | University of Turku, Turku, Finland                                                           |
| 1073 | Nina Pitkänen                           | Auria Biobank / University of Turku / Hospital District of Southwest Finland, Turku, Finland  |
| 1074 |                                         |                                                                                               |
| 1075 | <b>Biobank directors</b>                |                                                                                               |
| 1076 | Lila Kallio                             | Auria Biobank / University of Turku / Hospital District of Southwest Finland, Turku, Finland  |
| 1077 | Sirpa Soini                             | THL Biobank / The National Institute of Health and Welfare Helsinki, Finland                  |
| 1078 | Jukka Partanen                          | Finnish Red Cross Blood Service / Finnish Hematology Registry and Clinical Biobank,           |
| 1079 | Helsinki, Finland                       |                                                                                               |
| 1080 | Eero Punkka                             | Helsinki Biobank / Helsinki University and Hospital District of Helsinki and Uusimaa,         |
| 1081 | Helsinki                                |                                                                                               |
| 1082 | Raisa Serpi                             | Northern Finland Biobank Borealis / University of Oulu / Northern Ostrobothnia Hospital       |
| 1083 | District, Oulu, Finland                 |                                                                                               |
| 1084 | Kimmo Savinainen (acting)               | Finnish Clinical Biobank Tampere / University of Tampere / Pirkanmaa Hospital District,       |
| 1085 | Tampere, Finland                        |                                                                                               |
| 1086 | Veli-Matti Kosma                        | Biobank of Eastern Finland / University of Eastern Finland / Northern Savo Hospital District, |
| 1087 | Kuopio, Finland                         |                                                                                               |
| 1088 | Teijo Kuopio                            | Central Finland Biobank / University of Jyväskylä / Central Finland Health Care District,     |
| 1089 | Jyväskylä, Finland                      |                                                                                               |
| 1090 |                                         |                                                                                               |
| 1091 | <b>FinnGen Teams</b>                    |                                                                                               |
| 1092 | <b>Administration</b>                   |                                                                                               |
| 1093 | Anu Jalanko                             | Institute for Molecular Medicine Finland, HiLIFE, University of Helsinki, Finland             |
| 1094 | Huei-Yi Shen                            | Institute for Molecular Medicine Finland, HiLIFE, University of Helsinki, Finland             |
| 1095 | Risto Kajanne                           | Institute for Molecular Medicine Finland, HiLIFE, University of Helsinki, Finland             |
| 1096 | Mervi Aavikko                           | Institute for Molecular Medicine Finland, HiLIFE, University of Helsinki, Finland             |
| 1097 |                                         |                                                                                               |
| 1098 | <b>Analysis</b>                         |                                                                                               |
| 1099 | Mitja Kurki                             | Institute for Molecular Medicine Finland, HiLIFE, University of Helsinki, Finland / Broad     |
| 1100 | Institute, Cambridge, MA, United States |                                                                                               |
| 1101 | Juha Karjalainen                        | Institute for Molecular Medicine Finland, HiLIFE, University of Helsinki, Finland             |
| 1102 | Pietro Della Briotta Parolo             | Institute for Molecular Medicine Finland, HiLIFE, University of Helsinki, Finland             |
| 1103 | Arto Lehisto                            | Institute for Molecular Medicine Finland, HiLIFE, University of Helsinki, Finland             |
| 1104 | Juha Mehtonen                           | Institute for Molecular Medicine Finland, HiLIFE, University of Helsinki, Finland             |
| 1105 | Wei Zhou                                | Broad Institute, Cambridge, MA, United States                                                 |
| 1106 | Masahiro Kanai                          | Broad Institute, Cambridge, MA, United States                                                 |
| 1107 | Mutaamba Maasha                         | Broad Institute, Cambridge, MA, United States                                                 |
| 1108 |                                         |                                                                                               |
| 1109 | <b>Clinical Endpoint Development</b>    |                                                                                               |
| 1110 | Hannele Laivuori                        | Institute for Molecular Medicine Finland, HiLIFE, University of Helsinki, Finland             |
| 1111 | Aki Havulinna                           | Institute for Molecular Medicine Finland, HiLIFE, University of Helsinki, Finland             |
| 1112 | Susanna Lemmelä                         | Institute for Molecular Medicine Finland, HiLIFE, University of Helsinki, Finland             |
| 1113 | Tuomo Kiiskinen                         | Institute for Molecular Medicine Finland, HiLIFE, University of Helsinki, Finland             |
| 1114 | L. Elisa Lahtela                        | Institute for Molecular Medicine Finland, HiLIFE, University of Helsinki, Finland             |
| 1115 |                                         |                                                                                               |
| 1116 | <b>Communication</b>                    |                                                                                               |
| 1117 | Mari Kaunisto                           | Institute for Molecular Medicine Finland, HiLIFE, University of Helsinki, Finland             |
| 1118 |                                         |                                                                                               |
| 1119 | <b>E-Science</b>                        |                                                                                               |
| 1120 | Elina Kilpeläinen                       | Institute for Molecular Medicine Finland, HiLIFE, University of Helsinki, Finland             |
| 1121 | Timo P. Sipilä                          | Institute for Molecular Medicine Finland, HiLIFE, University of Helsinki, Finland             |
| 1122 | Oluwaseun Alexander Dada                | Institute for Molecular Medicine Finland, HiLIFE, University of Helsinki, Finland             |

|      |                                            |                                                                                       |
|------|--------------------------------------------|---------------------------------------------------------------------------------------|
| 1123 | Awaisa Ghazal                              | Institute for Molecular Medicine Finland, HiLIFE, University of Helsinki, Finland     |
| 1124 | Anastasia Shcherban                        | Institute for Molecular Medicine Finland, HiLIFE, University of Helsinki, Finland     |
| 1125 |                                            |                                                                                       |
| 1126 | <b>Genotyping</b>                          |                                                                                       |
| 1127 | Kati Donner                                | Institute for Molecular Medicine Finland, HiLIFE, University of Helsinki, Finland     |
| 1128 | Timo P. Sipilä                             | Institute for Molecular Medicine Finland, HiLIFE, University of Helsinki, Finland     |
| 1129 | <b>Sample Collection Coordination</b>      |                                                                                       |
| 1130 | Anu Loukola                                | Helsinki Biobank / Helsinki University and Hospital District of Helsinki and Uusimaa, |
| 1131 | Helsinki                                   |                                                                                       |
| 1132 |                                            |                                                                                       |
| 1133 | <b>Sample Logistics</b>                    |                                                                                       |
| 1134 | Päivi Laiho                                | THL Biobank / The National Institute of Health and Welfare Helsinki, Finland          |
| 1135 | Tuuli Sistonen                             | THL Biobank / The National Institute of Health and Welfare Helsinki, Finland          |
| 1136 | Essi Kaiharju                              | THL Biobank / The National Institute of Health and Welfare Helsinki, Finland          |
| 1137 | Markku Laukkanen                           | THL Biobank / The National Institute of Health and Welfare Helsinki, Finland          |
| 1138 | Elina Järvensivu                           | THL Biobank / The National Institute of Health and Welfare Helsinki, Finland          |
| 1139 | Sini Lähteenmäki                           | THL Biobank / The National Institute of Health and Welfare Helsinki, Finland          |
| 1140 | Lotta Männikkö                             | THL Biobank / The National Institute of Health and Welfare Helsinki, Finland          |
| 1141 | Regis Wong                                 | THL Biobank / The National Institute of Health and Welfare Helsinki, Finland          |
| 1142 |                                            |                                                                                       |
| 1143 | <b>Registry Data Operations</b>            |                                                                                       |
| 1144 | Hannele Mattsson                           | THL Biobank / The National Institute of Health and Welfare Helsinki, Finland          |
| 1145 | Kati Kristiansson                          | THL Biobank / The National Institute of Health and Welfare Helsinki, Finland          |
| 1146 | Susanna Lemmelä                            | Institute for Molecular Medicine Finland, HiLIFE, University of Helsinki, Finland     |
| 1147 | Sami Koskelainen                           | THL Biobank / The National Institute of Health and Welfare Helsinki, Finland          |
| 1148 | Tero Hiekkalinna                           | THL Biobank / The National Institute of Health and Welfare Helsinki, Finland          |
| 1149 | Teemu Paaajanen                            | THL Biobank / The National Institute of Health and Welfare Helsinki, Finland          |
| 1150 |                                            |                                                                                       |
| 1151 | <b>Sequencing Informatics</b>              |                                                                                       |
| 1152 | Priit Palta                                | Institute for Molecular Medicine Finland, HiLIFE, University of Helsinki, Finland     |
| 1153 | Kalle Pärn                                 | Institute for Molecular Medicine Finland, HiLIFE, University of Helsinki, Finland     |
| 1154 | Mart Kals                                  | Institute for Molecular Medicine Finland, HiLIFE, University of Helsinki, Finland     |
| 1155 | Shuang Luo                                 | Institute for Molecular Medicine Finland, HiLIFE, University of Helsinki, Finland     |
| 1156 | Vishal Sinha                               | Institute for Molecular Medicine Finland, HiLIFE, University of Helsinki, Finland     |
| 1157 |                                            |                                                                                       |
| 1158 | <b>Trajectory</b>                          |                                                                                       |
| 1159 | Tarja Laitinen                             | Pirkanmaa Hospital District, Tampere, Finland                                         |
| 1160 | Mary Pat Reeve                             | Institute for Molecular Medicine Finland, HiLIFE, University of Helsinki, Finland     |
| 1161 | Marianna Niemi                             | University of Tampere, Tampere, Finland                                               |
| 1162 | Harri Siirtola                             | University of Tampere, Tampere, Finland                                               |
| 1163 | Javier Gracia-Tabuena                      | University of Tampere, Tampere, Finland                                               |
| 1164 | Mika Helminen                              | University of Tampere, Tampere, Finland                                               |
| 1165 | Tiina Luukkaala                            | University of Tampere, Tampere, Finland                                               |
| 1166 | Iida Vähätalo                              | University of Tampere, Tampere, Finland                                               |
| 1167 |                                            |                                                                                       |
| 1168 | <b>Data protection officer</b>             |                                                                                       |
| 1169 | Tero Jyrhämä                               | Institute for Molecular Medicine Finland, HiLIFE, University of Helsinki, Finland     |
| 1170 |                                            |                                                                                       |
| 1171 | <b>FINBB - Finnish biobank cooperative</b> |                                                                                       |
| 1172 | Marco Hautalahti                           |                                                                                       |
| 1173 | Johanna Mäkelä                             |                                                                                       |
| 1174 | Laura Mustaniemi                           |                                                                                       |
| 1175 | Mirkka Koivusalo                           |                                                                                       |
| 1176 | Sarah Smith                                |                                                                                       |
| 1177 | Tom Southerington                          |                                                                                       |
